# Supplementary material for: Progressive mural cell deficiencies across the lifespan in a foxf2 model of cerebral small vessel disease
Source: eLife. 2026 Mar 6;14:RP106720. doi: 10.7554/eLife.106720 (PMC12965718; doi:10.7554/eLife.106720)
Supplement: Figure 1—source data 1. [file elife-106720-fig1-data1.xlsx]

## Sheet: N's for Figure 1
Figure	Genotype	Age	# of Fish
Figure 1C	Wildtype	3 dpf	10
		5 dpf	17
		7 dpf	10
		10 dpf	10
	foxf2a-/-	3 dpf	9
		5 dpf	26
		7 dpf	21
		10 dpf	11
Figure 1F	foxf2a+/+	3 dpf	7
	foxf2a+/-		21
	foxf2a-/-		8
For Figure 1 supplement 2
Figure	Genotype	Age	# of Fish
Figure 1-FS2B	Wildtype	3 dpf	3
		5 dpf	3
		7 dpf	3
		10 dpf	2
	foxf2a-/-;foxf2b-/-	3 dpf	5
		5 dpf	5
		7 dpf	5
		10 dpf	4

## Sheet: Pericytes per day
Figure 1, C: Raw data for pericyte counts per day
	Wildtype						foxf2a
Day	3	5	7	10		Day	3	5	7	10
	19	54	83	103				34	51
	20	59	87	99				62	94
	22	64	81	97				33	73
	23	63	125	139				52	58
	24	81	85	91			5	46	57	77
	20	51	97	137			9	50	82	91
	21	52	94	105			10	53	67	77
	21	60	93	108			17	74	82	94
	21	66	102	123				65	75	92
	23	63	128	134				22	75
		64						15	98
		68						19
		65						22	98
		79					10	19	15
		70						12	17
		54					11	21	13	13
		60						13		14
							9	12
							9	12
							8	13	24	19
								17	13	17
								16	19
								13	14	13
								20		11
								20	21
								18	19

## Sheet: Longitudinal pericytes
Figure 1,D: Pericyte longitudinal
	Wildtype
Dpf	Column2	Column3	Column4	Column5	Column6	Column7	Column8	Column9	Column10	Column11
3	19	20	22		24	20	21	21	21	23
5	51	52	60	66	63	64	68	65	79	70
7	83	87	81	125	85	97	94	93	102	128
10	103	99	97	139	91	137		108	123	134
	foxf2a mutant
Dpf	Column2	Column3	Column4	Column5	Column6	Column7	Column8	Column9	Column10	Column11	Column12	Column13	Column14	Column15
3				8		10	11	5	9	10	12
5	12	13	21	19	12	15		33	52	46	50	53	34	62
7		14	19	24	13	17	13	57	82	67	82	75	51	94
10	11	13		19	17		13	77	91	77	94	92

## Sheet: Haploinsufficiency
Figure 1f: Pericyte numbers in foxf2a het and homozygote
foxf2a+/+	foxf2a-/+	foxf2a-/-
12	9	7
20	19	10
18	16	2
22	16	6
21	15	11
24	18	17
22	17	16
	10	14
	15	12
	14
	16
	13
	16
	16
	12
	15
	15
	16
	13
	13
	15

## Sheet: Pdgfrb HCR
Figure 1 supplement 3: Expression of pdgfrb integrated density
Wildtype	foxf2a
22.6353	15.935
24.3957	18.607
13.7632	29.629
31.5568	21.4845

## Sheet: Pdgfrb Tg
Figure 1 supplement 3: Expression of pdgfrb transgene integrated intensity
wildtype	foxf2a +/-	foxf2a -/-
68.4684	46.8588	64.7566
54.2356	68.4782	77.456
70.915	63.7848	67.6256
	64.3038
	80.5664
	74.9824
	60.455
	75.7804
	65.1924
	75.3036
	53.6372
	67.7804

## Sheet: Foxf2 HCR
Figure 1 supplement 3: Expression of foxf2b HCR integrated intensity
Wildtype	foxf2a
18.719	20.338
17.286	19.205
22.343	18.127
16.798	17.891

## Sheet: Foxf2a Foxf2b qPCR
Figure 1 supplement 3: Expression of foxf2a and foxf2b from qPCR
Control	foxf2a	foxf2b
1	0.959	1.133
1	0.989	0.817
1	2.564	1.217
1	1.586	1.455
