# Supplementary material for: Progressive mural cell deficiencies across the lifespan in a foxf2 model of cerebral small vessel disease
Source: eLife. 2026 Mar 6;14:RP106720. doi: 10.7554/eLife.106720 (PMC12965718; doi:10.7554/eLife.106720)
Supplement: Figure 2—source data 1. [file elife-106720-fig2-data1.xlsx]

## Sheet: Figure 2 n's
Figure	Genotype	Age	# of Fish per RNA extraction	# of Trials
Figure 2E	Wildtype	48 hpf	50	4
	foxf2a-/-		50	4
Figure	Genotype	Age	# of Fish	# of Vessel Segments
Figure 2G, I, J	foxf2a+/+	3 dpf	7	N/A
	foxf2a+/-		21
	foxf2a-/-		8
Figure 2H	foxf2a+/+		7	72
	foxf2a+/-		21	93
	foxf2a-/-		8	87
Fig 2 supp 2
Figure	Genotype	Age	Sex	# of Fish
Figure 2-FS1B	Wildtype	3 mpf	Male	2
			Female	2
		11 mpf	Male	4
			Female	3
	foxf2a-/-	3 mpf	Male	2
			Female	2
		11 mpf	Male	4
			Female	3
Figure 2-FS1 C-E	Wildtype	3 mpf	Male	2
			Female	2
		11 mpf	Male	2
			Female	2
	foxf2a-/-	3 mpf	Male	3
			Female	3
		11 mpf	Male	2
			Female	2

## Sheet: Network length
Figure 2F: vessel network length
foxf2a+/+	foxf2a-/+	foxf2a-/-
3443.56	4122.52	3657.4
3860.03	4217.24	3675.55
3811.68	3966.53	4292.12
3483.92	3739.65	3677.25
3746.17	4178.67	3554.31
4206.31	4031.76	4098.68
4221.91	3837.21	3636.98
	3695.41	3572.22
	4013.61
	3855.87
	3571.47
	3760.98
	3861.21
	3736.81
	4242.71
	3498.67

## Sheet: CtA diameter
Figure 2G: CtA diameter
foxf2a+/+	foxf2a-/+	foxf2a-/-
5.40737	5.1994	5.40737
4.36749	6.18728	4.36749
6.39526	7.01919	6.39526
5.97931	4.73145	5.97931
6.55124	6.75922	6.55124
5.09541	5.25139	5.09541
4.05553	5.09541	4.05553
5.61535	5.1994	5.61535
5.82332	4.62746	5.82332
5.45937	5.82332	5.45937
6.34326	5.51136	6.34326
5.35538	6.96719	6.65523
7.90308	6.75922	4.78345
5.09541	5.56335	5.45937
5.56335	6.55124	5.82332
8.21505	4.73145	6.23928
5.25139	5.56335	5.71934
3.22363	6.49925	6.29127
6.8632	4.47148	4.41949
6.55124	6.18728	4.62746
7.64311	4.78345	5.61535
5.04341	5.97931	3.79556
4.73145	5.77133	7.01919
5.09541	6.70722	3.79556
4.41949	5.77133	7.01919
6.34326	5.30338	6.70722
7.64311	5.71934	7.7991
4.88743	6.44725	8.05907
5.35538	7.69511	5.45937
5.61535	7.64311	4.78345
4.57547	6.39526	6.13529
5.56335	6.8632	5.51136
4.67946	4.99142	7.48713
		6.13529
5.77133	6.18728
5.35538	5.77133	3.95154
6.29127	6.29127	5.25139
5.1994	6.18728	5.30338
7.12317	8.73499	6.34326
6.44725	6.18728	7.7471
6.44725	6.9152	5.30338
6.39526	5.51136	7.12317
4.15952	5.30338	4.3155
6.23928	5.40737	5.56335
	7.90308	6.55124
6.08329		6.18728
4.83544	4.83544
6.55124	6.13529	6.01248
6.08329	6.49925	6.29609
5.45937	4.41949	6.46625
5.77133	7.27916	5.84231
7.69511	7.53913	6.63642
6.23928	4.88743	5.55871
6.70722	5.1994	4.76461
7.17517	6.34326	6.63642
	5.97931	6.01248
4.10752	4.41949	6.35281
4.78345
5.09541	5.45937	9.13216
5.71934	5.40737	6.12592
5.71934	6.23928	7.54396
5.71934	4.57547	10.0964
5.09541	4.57547	4.93477
5.87532	5.56335	7.31707
4.99142	4.67946	3.85706
4.78345	4.62746	5.95576
4.21151	3.4836	6.8633
4.47148	5.30338	7.82757
		5.72887
5.38854	5.82332
6.29609	5.97931	6.29609
4.82133	4.52348	4.31083
6.80658	6.29127	4.53772
3.40329	5.04341	7.77085
5.72887	5.97931	8.33806
7.20363	7.12317	6.97674
	4.41949	6.12592
	5.51136	6.01248
	4.36749	3.85706
		6.12592
	7.26035
	4.87805	6.01248
	6.63642	7.37379
	6.35281	5.55871
	5.44526	7.37379
	5.16166	7.37379
	6.52297	4.65116
	6.12592	5.72887
	7.31707	4.65116
	7.03347	5.55871
		4.65116
	5.89904	3.9705
	5.2751
	5.10493
	5.61543
	7.31707
	5.72887
	5.10493
	4.31083

## Sheet: Pericyte density
Figure 2H: Pericyte density
foxf2a+/+	foxf2a-/+	foxf2a-/-
0.0035	0.0022	0.0019
0.0052	0.0045	0.0027
0.0047	0.0038	0.0014
0.0063	0.0027	0.003
0.0059	0.0041	0.0048
0.005	0.004	0.0039
0.0057	0.0042	0.0038
	0.0049	0.0034
	0.0037
	0.0041
	0.0036
	0.0043
	0.0039
	0.0043
	0.0035
	0.0037

## Sheet: Pericyte coverage
Figure 2I: Pericyte process coverage
foxf2a+/+	foxf2a-/+	foxf2a-/-
48.2287	38.6043	25.855
39.0685	44.4677	27.5827
41.3899	38.0354	19.3042
34.4753	34.6858	21.7147
47.9607	34.5262	32.4534
46.6677	24.2927	28.2324
47.7312	31.5975	30.5758
	36.0736	27.5242
	20.2413
	34.6236

## Sheet: Snout tail length
Figure 2 supplement 2: snout tail length
Wildtype 3 mos	foxf2a-/- 3 mos	Wildtype 11 mos	foxf2a-/- 11 mos
25	22	30	26
23	22	33	27
22	22	29	27
24	24	32	26
		35	28.5
		30.5	32
		31	31

## Sheet: Brain length
Figure 2 supplement 2: brain length
Wildtype 3 mos	foxf2a-/- 3 mos	Wildtype 11 mos	foxf2a-/- 11 mos
271.198	227.089	355.4	300.6
266.959	267.398	339.7	364.2
268.205	280.498	335.9	306.4
263.306	273.099	325	339.8
	277.07
	257.433

## Sheet: Brain width
Figure 2 supplement 2: brain width
Wildtype 3 mos	foxf2a-/- 3 mos	Wildtype 11 mos	foxf2a-/- 11 mos
224.151	194.808	274.1	240.9
224.405	211.61	273.1	268.3
214.371	208.719	274.1	247.7
220.27	220.238	261.4	274.6
	203.68
	196.744

## Sheet: Brain ratio length
Figure 2 supplement 2: brain to standard length ratio
Wildtype 3 mos	foxf2a-/- 3 mos	Wildtype 11 mos	foxf2a-/- 11 mos
1.08	1.03	1.11	1.16
1.16	1.22	0.97	1.28
1.22	1.27	1.1	0.96
1.1	1.14	1.05	1.1
