# Supplementary material for: Progressive mural cell deficiencies across the lifespan in a foxf2 model of cerebral small vessel disease
Source: eLife. 2026 Mar 6;14:RP106720. doi: 10.7554/eLife.106720 (PMC12965718; doi:10.7554/eLife.106720)
Supplement: Figure 3—source data 1. [file elife-106720-fig3-data1.xlsx]

## Sheet: N's for experiments
Figure	Genotype	Age	# of Fish
Figure 3E-G	Wildtype	3 mpf	3
	foxf2a-/-		3
Figure	Genotype	Age	# of Fish	# of Segments
Figure 3H-I	Wildtype	3 mpf	3	522029
	foxf2a-/-		3	377031

## Sheet: Pericyte #
Figure 3E: Total pericyte number per adult brain
	WT	Mut
1	5.7x10^4	2.24x10^4
2	6.49x10^	2.39x10^4
3	4.26x10^4	2.74x10^4

## Sheet: Vessel length
Figure 3F: Vessel network length
	Column1	Column2		EH WT - 6 mon	EH Mut
1	MFG WT - 3mon	MFG Mut		4.44x10^6	3.19x10^6 um
2	5.03x10^6	3.48x10^6		6.06x10^6	2.48x10^6
3	6.01x10^6	4.44x10^6		4.72x10^6	3.88x10^6
	4.64x10^6	4.66x10^6

## Sheet: Pericyte density
Figure 3G: Pericyte density (#/length)
Pericytes	WT	Mut		Density	WT	Mut
	57000	22400			0.011332	0.00643678
	64900	23900			0.0107987	0.00538288
	42600	27400			0.00918103	0.00587983
Vessel length	5030000	3480000
	6010000	4440000
	4640000	4660000

## Sheet: Vessel diameter
Figure 3H: Raw vessel diameter measurements
	WT1	WT2	WT3	MUT1	MUT2	MUT3
	12.347	5.91	8.508
	10.112	10.835	10.557	6.598	6.842	13.833
	13.697	12.332	7.718	10.322	17.112	14.445
	10.105	11.957	11.778	12.241	10.749	12.458
	11.781	8.052	10.358	11.882	14.579	12.128
	20.542	8.652	8.341	8.832	6.716	15.056
	14.915	18.469	13.684	16.043	19.111	9.129
	11.482	14.019	8.524	11.461	14.09	12.437
	20.595	16.331	9.617	7.493	9.182	13.857
	13.417	11.165	11.422	13.512	8.189	11.054
	7.903	12.394	10.022	10.329	8.881	11.332
	12.371	22.797	8.502	15.914	13.781	10.317
	13.912	11.089	9.004	14.69	11.449	11.309
	20.449	9.948	13.875	4.062	10.265	14.463
	13.419	12.731	11.938	11.746	10.699	12.09
	15.777	13.632	9.174	4.297	14.016	16.355
	9.377	10.443	10.072	7.656	13.361	13.522
	35.935	9.513	12.21	12.303	11.683	10.564
	17.347	12.851	9.338	21.566	15.99	13.021
	18.147	12.023	9.924	7.377	11.727	17.069
	12.348	16.562	8.163	14.813	9.727	12.71
	8.578	8.096	11.535	5.397	11.824	11.099
	12.943	12.195	11.108	11.197	11.922	12.94
	11.295	6.91	11.089	9.844	7.852	6.522
	11.459	12.962	9.924	15.202	6.41	10.229
	11.157	13.859	9.165	12.284	5.471	20.197
	14.273	9.365	12.412	12.131	9.617	13.644
	14.779	13.731	14.503	9.822	10.454	12.451
	10.29	11.824	11.51	18.786	13.981	13.481
	14.457	50.599	12.12	11.805	8.665	7.217
	6.223	11.789	17.999	14.748	13.725	13.159
	14.994	15.379	13.966	11.141	11.911	10.591
	11.307	9.648	12.521	12.825	6.573	14.577
	13.087	8.695	9.442	11.565	9.536	10.505
	10.316	13.02	14.473	12.52	13.237	9.762
	14.597	11.031	15.934	13.9	13.283	11.919
	7.998	17.644	14.972	11.2	10.064	10.761
	42.779	7.343	16.309	9.592	13.146	14.796
	13.333	10.729	12.428	12.733	6.592	13.421
	13.148	18.028	10.074	15.542	41.158	11.106
	12.942	19.245	9.394	14.45	45.208	13.999
	5.791	10.37	5.563	14.891	54.212	13.847
	7.733	10.174	7.42	13.395	4.849	11.835
	6.617	12.535	11.478	15.294	10.609	13.119
	10.385	8.527	7.22	10.907	7.883	10.196
	6.9	15.859	5.734	7.808	9.338	13.061
	11.655	12.429	8.841	9.029	7.283	11.386
	11.59	13.705	10.662	14.961	8.247	12.215
	11.657	9.235	5.554	12.129	5.078	11.488
	9.696	9.121	7.783	13.621	9.195	11.53
	12.452	9.198	9.062	9.545	13.177	10.512
	5.055	7.213	9.846	11.099	10.56	6.688
	11.337	15.29	17.074	9.43	10.926	9.384
	14.049	13.178	13.007	23.812	12.431	12.812
	11.156	8.858	12.826	15.823	13.957	9.402
	9.093	13.319	10.414	14.095	13.839	12.897
	10.869	9.904	11.795	13.686	12.678	10.176
	10.307	13.184	6.537	12.593	10.223	12.343
	11.217	11.515	9.102	14.964	9.371	11.236
	8.867	17.96	9.369	17.392	10.528	12.041
	8.381	12.101	10.866	12.947	5.132	8.462
	8.86	9.659	11.856	12.999	8.581	10.924
	13.853	12.802	13.247	12.627	8.996	11.763
	16.569	14.245	11.34	14.152	7.066	9.948
	11.643	12.253	11.481	20.629	10.583	8.954
	10.283	8.797	11.088	18.312	11.831	11.029
	13.348	12.294	15.232	10.864	12.082	11.075
	13.401	7.319	11.297	12.562	11.822	12.695
	7.788	9.933	10.83	13.411	15.743	16.136
	6.838	12.541	9.196	12.557	13.806	21.838
	11.929	12.786	13.78	9.137	9.527	12.278
	13.881	10.627	9.946	9.455	11.896	13.518
	12.766	13.392	9.609	8.048	9.719	13.949
	12.942	10.657	11.002	44.403	10.186	12.772
	12.097	13.88	18.021	13.269	13.793	13.735
	12.294	13.615	9.582	13.265	6.71	12.327
	6.397	15.116	14.877	12.991	10.596	11.093
	11.601	24.171	12.634	10.821	10.141	10.589
	7.878	13.828	13.757	13.492	9.243	12.868
	13.43	12.902	10.72	11.955	10.986	9.41
	7.29	11.987	11.282	12.925	11.435	7.669
	10.458	15.161	9.812	17.581	9.188	19.435
	14.654	9.638	9.706	7.762	8.685	28.853
	14.708	14.314	7.585	22.53	7.091	12.837
	16.026	19.801	9.337	14.383	11.316	15.4
	10.709	15.06	6.648	19.482	14.057	29.089
	17.277	12.633	11.066	31.992	14.222	13.238
	6.414	7.777	9.938	20.258	7.022	17.96
	12.976	11.721	8.858	16.314	7.48	14.349
	9.24	10.824	10.77	17.415	14.004	23.99
	12.542	13.616	9.283	13.651	8.977	14.673
	7.563	13.314	8.009	11.216	12.543	17.147
	10.584	13.224	12.533	13.843	7.646	11.015
	11.866	11.163	12.107	13.863	11.527	7.93
	13.79	12.905	10.623	30.461	8.676	19.171
	8.32	13.076	10.146	24.014	9.648	15.135
	11.621	13.72	13.307	13.839	9.099	14.446
	13.114	14.073	12.752	12.524	6.439	13.462
	10.534	17.221	11.893	12.48	10.751	13.965
	12.776	11.997	12.267	9.543	14.134	18.213
	9.187	15.546	9.931	11.534	8.538	10.235
	12.341	17.196	9.517	12.752	11.447	21.232
	12.943	11.591	11.413	8.994	13.535	14.67
	13.684	11.009	9.238	11.165	5.84	10.067
	13.089	8.361	9.977	10.433	8.909	10.564
	11.847	16.757	12.405	18.827	7.39	13.871
	12.54	16.807	10.564	20.525	11.954	16.14
	14.823	15.123	13.287	13.671	12.086	12.9
	11.758	13.587	10.835	13.746	9.633	14.637
	9.865	14.365	12.01	16.281	9.617	11.713
	10.316	13.149	10.45	14.499	13.429	8.353
	8.952	9.13	10.182	13.729	15.036	16.6
	11.333	18.842	10.883	14.225	17.467	10.722
	9.736	14.644	12.517	12.546	11.598	7.808
	15.542	12.89	8.449	19.378	11.67	8.503
	14.8	11.204	14.652	10.485	12.587	23.922
	11.122	14.06	16.116	9.455	15.914	25.418
	9.312	9.999	10.571	13.125	7.951	11.989
	10.572	15.74	7.157	8.494	14.54	7.44
	10.889	16.491	8.836	9.997	8.894	9.898
	11.573	10.294	7.944	9.359	14.763	5.64
	13.479	17.939	10.311	13.282	10.465	13.763
	13.412	11.473	12.056	14.115	12.397	14.103
	10.429	9.683	9.861	8.492	13.972	12.844
	9.009	11.351	8.823	17.773	7.097	11.594
	8	8.513	9.034	23.305	8.117	12.818
	11.187	14.982	14.164	13.875	12.254	7.687
	13.546	14.235	12.206	13.124	17.496	12.788
	12.627	23.152	11.67	14.297	12.654	11.915
	13.24	35.553	18.357	20.353	14.221	9.204
	8.557	16.059	10.005	9.403	7.36	7.85
	12.399	49.74	10.286	11.429	11.054	12.381
	9.908	15.457	13.551	13.404	12.231	12.54
	12.295	14.815	13.167	13.829	16.072	12.72
	9.745	13.53	13.565	12.106	8.765	13.733
	8.827	22.15	10.488	24.46	11.249	21.196
	9.056	12.432	9.183	11.749	11.457	15.367
	11.511	24.226	6.638	40.768	11.75	11.43
	12.014	79.652	17.438	15.416	7.395	11.548
	14.673	64.45	9.92	16.121	15.989	11.209
	13.756	20.301	10.531	12.221	12.025	13.961
	11.787	15.826	15.623	17.159	19.915	11.567
	12.559	14.68	7.418	9.185	16.261	9.812
	10.922	15.131	9.202	13.648	19.414	12.238
	14.171	11.416	10.953	9.998	7.121	7.401
	14.093	17.76	11.428	13.804	34.721	11.727
	18.589	11.048	10.489	9.109	52.479	8.137
	16.07	11.125	12.95	9.508	10.191	14.326
	13.214	11.01	9.351	12.197	14.222	14.16
	13.86	12.697	11.925	18.271	14.507	14.611
	11.362	19.461	10.504	12.326	11.745	13.368
	11.226	11.845	12.137	13.256	10.764	13.892
	11.83	8.734	9.847	11.543	10.356	18.166
	11.797	16.196	13.374	11.057	10.093	14.095
	11.488	12.594	14.682	14.884	11.373	13.707
	12.499	38.835	11.835	11.953	42.773	11.01
	12.128	8.751	10.018	10.037	18.104	10.654
	13.884	10.113	8.732	15.434	18.09	8.905
	18.355	16.113	12.645	12.287	13.143	11.489
	10.152	10.528	15.594	20.142	13.663	7.019
	13.083	12.164	12.576	21.197	12.232	15.048
	13.401	10.936	9.81	26.077	7.878	14.258
	32.435	20.621	10.482	10.467	10.919	13.899
	8.368	28.985	9.023	15.407	7.419	12.155
	7.537	64.346	9.072	19.381	10.2	14.48
	5.861	18.693	11.742	18.206	10.734	13.049
	6.696	24.061	10.313	9.539	11.343	15.098
	13.409	15.552	9.638	15.412	13.557	12.139
	14.739	13.85	9.778	14.107	10.366	18.202
	10.887	11.431	10.441	10.118	12.909	15.796
	12.826	8.888	7.384	16.56	11.065	14.32
	13.875	10.226	8.035	18.579	8.054	14.55
	13.606	13.138	11.356	11.986	8.781	9.56
	13.006	14.829	11.232	8.31	12.328	12.964
	12.682	17.375	9.637	8.798	9.249	14.385
	14.274	12.94	14.32	13.663	8.336	12.336
	13.065	17.627	11.475	14.498	12.369	10.206
	14.59	12.502	12.549	15.655	7.467	12.613
	13.568	13.141	9.876	13.771	12.677	13.529
	14.133	12.677	9.993	15.809	15.923	10.902
	13.78	10.973	7.939	12.081	26.148	16.051
	11.723	8.699	9.743	12.382	6.427	16.488
	11.805	12.538	10.163	12.471	11.61	15.55
	10.242	14.83	11.224	15.657	12.927	12.305
	10.585	14.183	16.388	15.576	13.901	11.568
	12.736	12.055	10.243	12.822	11.606	10.815
	16.533	14.867	8.196	15.892	9.106	14.591
	11.572	14.498	7.893	20.674	6.855	13.74
	11.409	17.447	7.469	14.812	9.621	12.008
	8.769	15.574	6.611	15.606	11.6	13.242
	10.723	30.455	10.794	15.147	17.657	14.522
	12.511	15.557	8.72	16.756	14.596	22.745
	12.428	16.401	8.107	20.679	11.519	14.596
	15.309	14.358	9.475	26.45	10.781	14.2
	13.676	14.495	7.55	27.633	7.829	13.262
	15.763	8.122	11.144	12.268	33.717	14.391
	14.938	11.031	7.822	10.75	15.57	15.99
	11.356	11.295	10.165	14.765	17.538	12.854
	8.265	8.825	10.841	8.847	20.402	12.715
	10.449	12.131	8.629	10.104	12.764	13.409
	14.241	13.973	11.833	13.34	7.161	15.149
	11.868	13.76	6.585	9.757	15.354	14.131
	15.493	13.615	11.125	8.236	13.349	15.052
	14.179	13.494	10.793	15.222	14.728	12.373
	13.494	16.764	15.258	11.447	7.788	7.544
	14.547	15.358	15.924	13.626	10.993	13.654
	13.809	15.428	14.671	13.994	10.54	14.951
	12.03	19.741	8.998	8.592	7.296	9.674
	11.489	13.157	9.076	11.677	8.767	8.811
	12.923	13.297	12.429	12.629	13.517	11.528
	16.126	15.987	12.276	16.464	16.18	13.921
	16.072	12.784	12.392	12.482	10.669	12.618
	14.824	13.484	9.631	18.106	10.303	12.359
	14.169	13.563	10.676	4.164	11.679	11.786
	16.051	15.076	12.147	4.381	10.145	12.564
	15.295	11.422	9.992	6.816	13.378	13.182
	11.637	14.07	9.506	4.289	9.292	13.422
	14.816	15.333	11.745	12.498	11.52	16.396
	10.115	15.279	6.724	4.411	11.297	18.477
	11.162	13.569	15.393	4.08	13.21	16.555
	12.924	13.696	9.393	4.628	11.569	15.048
	9.658	14	10.734	4.263	8.815	15.766
	12.22	13.877	7.005	7.452	14.318	13.322
	15.392	13.534	14.528	4.275	13.81	19.024
	12.16	12.831	11.897	4.149	14.263	14.557
	13.504	13.22	11.926	5.755	13.029	11.364
	15.042	12.821	19.419	4.775	13.672	11.996
	7.063	13.931	17.406	4.258	14.662	12.541
	12.2	14.043	9.744	4.111	12.079	11.995
	30.943	14.482	13.266	5.45	13.524	12.26
	16.712	15.305	12.093	9.301	14.039	12.914
	15.206	18.429	11.178	4.922	13.961	10.973
	15.472	11.85	11.643	4.258	7.509	14.397
	12.881	14.237	12.463	4.378	7.636	13.218
	20.75	17.009	6.962	11.163	14.166	14.914
	13.121	15.242	11.105	5.304	9.793	13.172
	14.063	16.672	9.954	4.668	9.184	14.817
	10.598	14.294	8.774	8.126	29.566	12.363
	10.963	14.719	8.854	7.08	10.008	10.885
	14.251	14.157	21.012	7.83	10.649	12.624
	13.497	12.985	22.659	6.07	10.523	12.726
	8.493	15.058	16.512	6.795	8.481	8.274
	16.023	16.978	11.668	4.197	14.703	14.009
	9.47	12.101	9.884	4.248	9.901	13.138
	12.241	12.241	12.856	5.711	8.82	13.822
	16.137	14.735	9.784	9.268	22.102	13.459
	14.005	14.614	12.947	6.296	14.69	13.446
	16.048	11.772	12.304	10.501	7.472	13.816
	13.377	14.643	10.615	5.372	11.271	13.258
	13.621	18.664	14.56	4.174	10.051	10.66
	18.69	14.528	22.971	4.452	13.536	14.77
	15.388	15.637	15.994	6.2	7.3	18.977
	16.829	13.715	10.942	4.723	12.139	18.063
	20.167	16.135	10.988	15.274	8.362	14.361
	20.603	17.016	12.35	5.358	9.886	14.05
	11.696	16.243	8.428	4.72	13.327	12.539
	14.255	15.957	14.357	5.359	13.917	14.06
	15.772	16.863	11.762	6.575	10.154	14.921
	12.761	10.309	11.32	21.641	8.238	14.658
	12.38	12.833	7.902	5.27	8.236	15.319
	12.698	12.256	7.93	5.171	16.042	11.822
	13.596	14.033	9.599	5.322	13.62	14.746
	13.105	12.726	12.248	4.767	9.207	13.021
	11.69	16.33	12.648	4.593	12.339	11.088
	13.588	13.36	8.467	6.424	13.122	7.716
	14.024	13.367	8.177	8.702	8.414	8.51
	14.042	14.728	9.125	5.248	8.972	13.234
	12.177	15.116	8.641	7.376	12.148	9.919
	12.07	11.399	8.123	6.585	8.428	11.5
	10.854	12.679	8.74	5.099	10.859	15.784
	13.164	13.759	42.89	9.295	13.448	13.021
	12.196	14.074	13.132	7.935	9.968	12.584
	9.715	15.83	15.184	13.548	40.6	10.822
	13.92	16.558	10.707	4.309	31.233	12.64
	12.737	13.655	11.725	5.24	10.806	12.18
	12.875	15.747	11.312	6.72	11.091	13.72
	12.098	13.255	16.223	8.941	12.102	14.396
	13.385	14.972	8.571	9.216	12.614	16.154
	12.815	12.137	9.329	11.242	13.751	15.085
	14.204	13.18	10.154	7.637	14.476	14.615
	14.412	14.307	10.723	8.29	15.168	12.958
	10.691	13.147	11.58	5.84	13.483	12.991
	10.762	16.374	9.23	4.568	22.286	13.841
	10.163	13.96	11.891	4.403	18.553	10.845
	15.993	13.912	16.343	7.701	17.45	13.091
	15.574	14.769	12.734	4.857	12.663	14.162
	14.925	15.597	9.775	5.374	13.941	12.401
	9.884	12.42	11.309	7.994	15.969	13.027
	8.782	9.109	14.59	4.361	14.017	12.038
	13.519	16.176	12.569	8.89	12.039	12.205
	9.373	13.285	16.272	4.266	13.138	13.207
	14.758	15.694	10.742	5.575	13.885	17.631
	13.555	14.203	10.801	4.32	12.958	10.976
	15.385	15.423	10.797	4.136	13.514	12.311
	15.485	13.15	8.696	8.947	13.306	11.046
	16.218	13.686	8.337	4.168	13.007	12.654
	18.091	14.349	11.795	8.52	16.932	11.006
	16.72	15.129	8.06	4.119	27.546	7.747
	13.685	14.965	13.532	5.107	10.02	13.451
	18.987	16.634	11.308	5.293	13.579	13.431
	13.523	18.576	19.072	14.122	11.2	14.096
	21.314	13.931	14.343	16.76	10.727	18.172
	17.947	12.192	12.15	4.292	13.563	16.364
	18.841	14.796	12.246	4.626	8.489	13.303
	11.456	13.812	11.771	5.075	11.954	12.663
	13.305	16.394	10.436	6.933	12.943	11.896
	9.967	14.47	38.702	9.322	13.966	14.12
	38.781	12.328	7.374	5.994	12.506	12.962
	15.305	17.092	13.965	4.932	10.847	11.646
	15.095	14.943	13.257	5.614	9.323	11.157
	18.3	13.523	10.8	12.305	13.427	13.923
	10.955	10.497	7.501	5.611	10.819	11.785
	13.349	12.81	7.343	4.221	12.872	14.9
	17.61	12.821	7.724	8.908	13.436	9.826
	9.659	16.904	12.739	11.249	7.839	13.075
	11.863	14.547	12.058	12.538	11.275	13.545
	8.631	14.875	19.631	4.792	10.164	15.207
	9.299	14.848	24.834	7.72	13.814	14.867
	11.861	16.43	14.778	10.992	12.477	13.922
	15.543	16.184	12.283	13.673	14.163	12.906
	16.351	28.778	11.535	4.626	13.284	13.394
	14.382	14.558	13.785	8.865	11.717	13.045
	13.054	12.396	12.978	9.071	12.933	10.157
	12.08	11.95	13.515	12.556	11.923	10.913
	12.609	12.703	7.573	4.769	17.455	12.486
	15.525	15.518	9.662	8.336	13.773	11.108
	12.103	13.755	8.93	4.323	11.161	13.366
	13.164	14.562	9.335	4.696	15.257	19.697
	12.582	15.271	11.318	4.31	11.414	12.809
	10.814	14.541	11.483	4.455	10.427	10.682
	23.278	11.939	10.552	6.069	10.179	16.541
	12.371	13.594	13.295	12.029	12.011	14.968
	12.687	16.741	24.503	28.698	11.349	9.722
	13.496	16.329	12.441	22.357	10.548	12.411
	9.452	19.128	11.715	8.524	33.438	14.005
	12.616	15.87	11.785	8.375	5.818	13.67
	7.28	10.058	13.094	27.213	5.954	12.647
	11.761	11.927	11.446	7.869	5.784	11.524
	12.303	13.436	7.941	4.344	4.416	10.665
	10.158	12.036	9.851	5.083	6.68	14.29
	10.974	13.046	15.134	5.178	4.447	12.907
	8.932	12.505	15.285	9.565	5.398	12.596
	9.895	12.976	14.275	5.957	5.506	11.828
	12.711	13.721	7.785	8.679	5.907	14.403
	13.166	12.662	11.592	5.238	11.957	25.285
	14.869	12.605	8.809	8.873	7.405	14.092
	12.188	12.816	12.449	9.519	4.665	12.975
	11.616	16.952	8.916	5.138	8.26	12.773
	9.619	16.604	9.539	9.416	6.147	10.646
	10.363	14.583	9.011	5	4.924	13.773
	11.54	14.536	13.817	13.77	7.73	10.621
	12.96	16.501	9.968	22.679	5.381	10.435
	11.128	12.06	12.679	26.403	4.451	10.74
	11.674	13.837	10.479	4.351	4.238	7.255
	16.091	13.758	11.879	6.026	11.185	11.936
	24.007	10.075	11.652	12.007	7.589	11.381
	14.32	13.297	18.499	12.805	4.823	16.257
	15.405	11.731	11.906	14.089	8.293	13.291
	14.048	13.209	14.13	13.044	4.248	12.348
	13.251	18.153	13.387	12.38	9.854	14.981
	12.565	21.496	26.61	13.652	11.685	15.841
	26.365	14.367	8.736	8.851	5.504	11.955
	12.901	11.182	13.029	13.094	14.339	11.66
	13.102	11.841	5.25	14.298	12.463	13.21
	13.555	14.678	12.123	7.786	8.055	12.505
	15.407	13.216	9.519	11.205	4.369	14.594
	9.222	16.474	12.93	4.624	5.511	11.278
	14.834	15.585	7.772	5.095	9.161	11.411
	13.904	15.273	10.239	14.1	5.914	13.725
	13.78	15.197	6.258	7.354	4.774	13.684
	11.152	14.224	11.821	11.635	5.696	11.864
	16.076	15.096	12.429	7.512	7.968	12.758
	21.083	12.992	14.115	12.165	5.208	13.271
	15.134	14.087	11.873	6.894	5.481	9.087
	13.247	13.718	12.226	4.166	6.091	13.372
	13.908	12.976	12.738	5.897	10.494	11.584
	13.266	13.092	14.483	4.404	12.211	11.751
	13.765	13.159	11.128	4.513	7.038	13
	15.569	14.838	6.608	4.392	8.976	15.241
	14.205	14.866	8.613	5.794	6.223	13.166
	12.534	15.379	8.226	4.906	5.576	11.399
	10.729	17.086	9.111	6.237	5.304	9.931
	11.074	14.113	11.405	7.207	5.072	14.254
	17.571	15.685	11.292	6.239	7.085	14.153
	10.82	28.71	11.184	4.718	7.533	12.397
	14.097	13.747	9.204	7.74	6.988	17.821
	16.464	13.663	10.525	14.364	5.814	12.578
	9.042	15.591	10.284	14.345	6.398	12.779
	10.327	15.112	11.386	5.418	10.564	12.014
	12.022	14.149	11.259	4.808	6.422	19.825
	11.987	12.859	13.038	11.599	11.826	16.248
	12.923	15.519	12.149	12.901	7.653	13.954
	11.993	15.65	10.138	4.344	4.971	12.717
	14.068	14.937	9.511	4.767	6.386	16.705
	13.097	13.229	10.785	13.743	7.54	13.779
	13.099	13.898	9.586	12.363	5.592	23.529
	12.752	12.624	9.481	6.624	10.31	8.872
	18.524	16.054	9.326	4.181	12.292	12.546
	22.312	14.941	8.286	4.956	9.156	11.014
	9.841	14.098	10.909	9.792	5.875	15.765
	11.399	15.568	9.094	9.295	11.117	15.769
	15.316	15.43	9.729	4.748	13.459	12.255
	18.943	25.911	5.607	11.918	14.863	12.673
	14.864	11.185	6.943	7.026	7.674	13.629
	13.308	9.054	11.846	5.047	9.579	13.673
	10.768	13.495	12.591	7.548	6.901	12.468
	13.585	15.16	6.576	5.59	11.616	13.184
	9.689	12.929	6.81	12.602	11.877	17.332
	13.776	14.608	10.59	4.235	12.742	31.159
	14.785	13.56	11.801	8.314	6.947	27.131
	13.833	14.1	13.999	4.852	8.196	26.398
	12.096	15.173	10.015	4.123	14.512	10.874
	11.186	13.66	11.061	4.298	10.316	13.184
	10.07	16.093	8.603	12.715	15.904	12.594
	8.735	11.728	11.21	8.197	17.606	16.409
	12.135	16.192	12.504	5.053	5.074	10.839
	11.58	15.682	8.25	5.331	12.025	15.686
	13.916	15.146	10.02	4.176	7.518	14.188
	20.699	19.265	8.724	4.272	6.401	14.274
	18.056	13.061	13.735	4.268	10.686	17.366
	12.764	13.381	6.526	5.063	12.277	19.473
	13.855	13.342	7.208	9.954	12.404	12.309
	15.076	14.009	12.604	4.315	13.852	12.41
	19.329	15.321	11.177	11.405	11.112	13.274
	14.613	12.796	12.605	4.154	7.877	12.703
	14.782	16.508	6.915	11.167	10.501	12.064
	14.233	14.47	11.729	5.013	11.449	9.598
	13.797	14.792	8.114	5.249	7.295	12.4
	12.934	12.673	7.934	13.753	8.402	13.67
	8.975	15.19	5.783	16.299	7.305	11.779
	8.79	13.424	8.199	7.324	7.219	12.059
	11.612	15.085	8.656	5.207	11.438	9.4
	15.877	24.027	8.355	6.225	5.713	18.11
	12.014	10.252	6.868	4.52	7.843	21.041
	15.169	11.473	6.51	4.313	11.315	11.277
	29.442	14.861	5.855	5.776	7.937	14.684
	9.622	15.433	12.009	11.636	7.439	14.067
	13.526	15.43	13.118	6.224	14.771	16.568
	16.74	14.239	6.696	9.49	11.014	16.69
	14.915	12.674	19.983	11.527	13.447	20.42
	14.141	14.391	8.615	4.226	12.077	11.957
	13.682	12.31	9.767	4.387	13.002	22.539
	14.622	15.801	7.788	11.403	12.935	10.177
	12.469	14.749	7.958	8.125	12.149	10.554
	31.654	14.801	11.798	4.91	14.375	11.605
	12.653	12.559	10.007	4.612	9.896	9.209
	9.113	11.707	7.498	10.084	6.545	10.55
	12.455	18.551	12.894	8.111	6.119	16.325
	11.102	17.824	12.988	6.364	5.861	20.276
	13.018	14.631	10.022	10.437	6.629	15.868
	13.675	11.349	9.642	11.111	29.993	20.455
	10.547	14.751	9.476	14.749	4.582	13.128
	14.675	18.466	8.018	14.342	7.255	17.372
	10.637	10.947	12.435	10.414	7.376	11.262
	15.179	29.526	11.032	12.222	12.87	14.242
	12.948	49.902	8.068	14.05	11.721	15.35
	13.634	13.821	9.863	12.471	4.617	13.049
	11.062	13.449	8.83	4.659	9.312	13.144
	12.871	13.862	8.424	4.772	10.653	17.874
	11.94	16.238	13.265	8.971	10.549	12.7
	12.852	13.221	13.076	5.584	13.001	10.357
	11.998	14.704	10.43	10.929	10.595	14.326
	11.603	13.963	11.202	4.314	12.417	15.819
	12.986	17.451	7.572	5.313	10.872	16.663
	19.331	17.093	9.729	6.937	7.395	14.43
	13.108	16.581	7.756	6.444	5.997	28.359
	15.87	15.485	8.847	4.376	6.078	22.591
	12.221	14.047	11.479	6.496	7.116	4.625
	14.33	14.568	11.155	9.548	8.179	4.899
	18.655	14.254	12.272	4.225	7.625	6.669
	9.21	15.755	7.16	10.771	5.138	12.533
	12.455	12.384	8.3	4.575	7.459	11.799
	15.954	13.536	11.828	4.788	11.363	4.482
	22.614	13.742	10.42	5.05	7.735	7.782
	20.837	13.652	10.448	7.543	8.069	4.968
	13.932	18.275	7.361	5.623	11.235	5.404
	10.856	17.13	7.897	13.552	8.789	4.252
	14.051	14.517	5.573	13.451	8.513	5.022
	14.584	12.773	10.999	13.823	5.015	4.371
	13.493	13.208	12.036	4.543	9.336	4.131
	18.743	12.854	9.486	10.374	8.88	5.816
	17.229	11.586	12.965	6.749	9.241	6.181
	13.732	13.918	6.841	5.824	12.504	6.943
	11.602	12.19	12.602	6.248	13.226	12.205
	42.941	12.403	9.08	11.569	10.718	11.718
	38.535	12.82	13.104	12.363	12.251	12.684
	17.245	13.785	11.398	4.44	16.118	4.714
	17.337	13.054	10.23	7.255	13.958	9.763
	76.839	12.999	10.075	8.97	8.556	7.468
	71.411	14.95	6.386	14.506	4.447	4.396
	69.084	13.205	5.729	24.351	7.106	5.169
	76.557	13.079	12.108	9.869	10.783	6.907
	15.306	15.787	9.297	26.911	6.587	10.491
	18.682	11.255	10.064	11.939	13.547	5.005
	11.876	15.835	8.816	13.493	7.713	4.506
	14.357	19.013	11.175	13.736	10.112	7.099
	14.422	13.831	10.829	5.21	4.649	8.483
	20.677	16.599	11.576	9.226	5.061	13.576
	16.468	13.83	12.048	16.698	4.955	14.139
	14.73	13.986	10.105	6.463	10.303	4.912
	12.454	13.277	10.709	5.178	7.386	8.608
	19.531	12.116	11.678	4.314	8.359	6.51
	14.793	12.249	8.823	4.327	9.693	9.909
	15.16	16.775	10.243	6.52	11.791	4.225
	12.94	13.523	11.122	10.282	7.713	15.067
	12.451	15.843	8.328	13.488	11.222	13.722
	16.138	14.943	10.723	11.143	5.948	13.833
	14.306	14.65	12.796	4.729	7.476	13.491
	11.772	12.163	12.677	5.341	11.625	7.647
	12.412	9.597	10.304	8.586	12.055	12.069
	12.133	14.106	9.464	5.908	6.794	5.986
	15.289	15.342	10.265	6.082	6.488	4.234
	13.257	14.219	10.6	9.193	10.608	4.354
	8.943	16.204	11.737	10.91	11.499	5.139
	22.823	17.91	9.848	11.437	10.135	9.314
	15.823	18.321	11.772	8.946	10.995	9.809
	14.707	12.201	7.495	15.515	8.553	12.715
	14.183	14.599	10.836	8.498	7.514	13.239
	13.036	10.532	13.593	11.07	11.602	5.383
	6.354	16.693	8.478	4.392	6.525	10.318
	12.109	11.365	9.165	6.095	8.783	12.545
	11.684	16.98	11.921	9.286	7.484	13.792
	11.773	12.617	11.749	17.555	5.493	11.042
	16.175	23.904	9.522	6.39	8.523	7.022
	15.563	10.282	10.265	5.566	12.345	4.319
	20.023	12.528	10.864	5.164	13.984	5.486
	15.25	12.808	7.115	6.027	9.359	5.103
	12.919	12.423	9.686	4.937	16.152	4.837
	13.288	15.618	9.461	17.409	8.514	6.761
	10.213	16.156	10.443	16.528	10.826	12.702
	15.017	18.55	9.798	17.815	9.37	14.206
	5.231	14.624	10.099	14.867	18.557	5.958
	7.283	14.698	7.196	11.661	13.005	4.724
	10.817	29.484	10.863	19.62	6.379	4.951
	7.093	13.255	9.095	12.88	7.526	4.86
	4.638	12.546	10.272	13.258	6.029	12.678
	5.974	14.265	9.592	17.767	6.906	4.857
	10.129	14.569	11.214	4.959	11.651	14.661
	5.443	21.23	11.379	9.512	7.39	7.978
	10.713	14.456	7.064	6.037	11.1	4.141
	11.233	11.633	12.761	12.135	9.567	4.948
	7.976	16.665	10.761	12.967	11.006	6.621
	7.902	15.236	7.061	8.236	8.751	10.075
	8.074	15.717	10.173	10.22	7.169	4.326
	14.318	14.437	8.936	7.723	14.117	4.46
	5.704	14.997	10.096	10.623	5.236	4.753
	13.033	15.983	7.076	6.135	5.927	15.757
	10.646	13.098	9.177	5.906	11.879	4.274
	4.179	12.621	12.019	5.226	6.187	5.073
	6.85	13.866	11.531	5.488	14.375	11.683
	9.863	18.82	13.635	11.993	12.729	11.299
	9.099	17.508	9.555	13.139	8.404	13.747
	11.75	14.054	12.998	12.254	12.791	10.684
	8.851	14.93	12.27	5.492	6.405	5.497
	8.243	14.263	10.613	5.995	12.863	7.142
	10.785	10.717	27.598	5.364	8.394	12.063
	5.249	15.916	5.852	9.829	5.874	11.916
	8.767	11.855	6.277	5.272	5.845	5.223
	7.772	15.353	10.115	8.732	8.642	6.479
	7.202	14.957	11.07	8.175	7.617	12.785
	5.937	11.402	8.84	8.932	5.209	13.624
	13.873	12.497	9.015	11.292	10.463	4.653
	13.901	13.672	8.195	9.82	9.297	11.555
	10.252	14.805	8.465	4.248	7.127	14.222
	11.769	13.384	10.033	7.803	8.546	13.731
	8.994	16.173	12.375	10.394	9.845	13.728
	5.243	15.132	12.621	6.066	13.338	14.731
	4.382	15.478	12.184	8.429	12.821	14.228
	8.775	14.504	10.043	11.949	13.923	11.923
	5.151	13.994	11.623	9.829	13.422	12.918
	11.444	12.668	7.362	6.238	7.53	4.624
	6.214	11.617	11.951	14.043	9.392	5.54
	10.374	10.585	7.354	7.379	6.436	7.925
	13.565	65.448	9.498	9.859	8.847	8.815
	4.598	13.256	9.834	12.127	14.078	8.924
	5.78	13.073	11.229	9.425	12.054	8.816
	10.513	13.423	10.457	10.255	9.419	12.716
	11.194	15.644	10.916	11.577	7.27	12.608
	9.195	13.978	6.536	10.628	7.313	6.56
	8.361	14.306	10.352	11.593	6.35	7.511
	8.674	13.264	11.511	10.25	11.317	12.274
	9.458	11.454	15.116	6.567	14.753	14.821
	6.853	11.994	12.742	16.639	12.063	4.905
	4.938	14.549	9.186	10.037	12.649	5.274
	8.879	14.756	8.578	12.248	9.149	5.662
	11.104	12.922	9.051	11.941	10.7	10.615
	4.174	16.435	10.15	5.782	8.609	18.538
	8.811	14.032	8.056	12.72	11.422	13.149
	7.88	12.718	9.467	5.466	7.805	12.579
	4.374	14.778	9.551	13.176	11.581	12.889
	9.647	36.458	8.356	4.391	6.029	15.009
	13.101	13.704	9.59	5.128	10.672	13.004
	13.362	16.432	6.884	8.577	8.221	11.128
	13.067	15.934	8.222	9.531	7.376	12.471
	9.744	16.253	6.346	5.69	7.806	5.567
	10.417	11.387	12.29	7.191	6.188	12.759
	8.138	14.555	10.729	11.351	5.349	13.483
	10.068	22.032	9.784	4.249	11.629	11.261
	8.09	30.698	10.006	4.754	4.756	12.905
	4.998	14.875	11.709	6.309	7.512	10.301
	6.347	13.338	9.963	4.83	5.736	13.114
	9.876	13.158	8.209	11.614	27.392	13.542
	6.894	11.537	10.655	16.706	8.533	14.977
	13.482	9.331	6.592	4.537	12.468	13.158
	14.22	15.141	7.734	4.293	7.853	14.055
	16.004	15.308	9.085	9.606	7.559	14.108
	10.179	13.61	11.077	10.93	11.086	13.388
	12.267	12.645	10.479	10.1	6.411	12.037
	13.89	11.501	9.962	19.634	8.738	10.848
	6.959	13.564	11.572	13.362	7.166	15.115
	11.429	12.502	10.888	14.465	10.896	11.768
	11.737	13.67	12.155	13.235	8.172	6.165
	7.423	13.377	12.611	21.038	10.491	11.303
	7.366	12.272	13.205	20.847	5.729	13.84
	8.29	12.906	8.444	21.242	5.663	9.207
	11.22	11.996	10.781	9.081	8.395	10.801
	13.047	13.692	8.974	9.126	5.353	10.464
	11.801	13.193	9.274	6.641	7.432	9.994
	13.686	13.341	10.237	7.322	13.424	12.067
	7.342	12.493	8.239	15.228	13.499	12.476
	9.356	13.82	9.702	12.139	7.838	13.572
	9.771	14.303	11.242	14.085	7.772	13.367
	18.394	12.447	8.648	11.886	9.57	12.549
	8.035	13.316	8.688	13.653	11.617	13.481
	44.146	14.474	10.219	14.067	13.152	8.432
	14.094	13.858	8.249	9.22	13.884	7.957
	11.999	13.78	11.323	10.32	10.688	11.24
	11.74	8.638	12.418	12.078	13.086	7.741
	12.48	7.232	8.465	10.057	15.175	11.627
	13.832	15.767	8.706	4.465	8.742	9.489
	7.165	10.396	7.991	6.603	8.756	13.888
	12.678	10.809	8.38	10.543	13.315	7.097
	14.147	11.158	9.079	12.426	8.449	10.665
	11.428	15.472	12.478	11.587	9.056	9.142
	7.73	24.141	12.228	4.699	8.198	8.877
	13.767	11.222	8.619	4.338	11.406	8.032
	10.256	18.79	7.056	11.171	16.882	5.136
	8.16	13.992	8.738	13.763	22.448	5.694
	11.41	14.009	15.86	10.641	18.864	7.464
	9.281	14.078	10.088	10.941	5.841	12.866
	11.638	13.983	8.225	4.15	6.378	13.933
	16.678	12.408	10.365	4.335	5.33	14.414
	11.629	10.905	10.389	4.875	6.442	9.147
	9.204	14.149	11.759	4.129	14.738	14.967
	15.619	15.038	16.781	4.713	13.683	8.941
	12.163	15.075	14.675	5.815	9.188	7.005
	12.057	15.001	13.757	7.215	9.794	7.368
	12.641	11.281	6.994	8.044	8.33	19.887
	14.051	12.415	7.429	7.281	12.91	5.271
	12.943	14.358	8.704	12.26	10.372	10.803
	8.138	14.316	8.814	13.756	10.626	9.923
	11.516	12.843	10.058	4.357	7.251	11.875
	11.363	15.272	7.501	14.007	7.58	12.325
	15.969	15.244	11.685	5.662	7.786	15.87
	13.137	15.431	10.358	5.072	6.309	19.112
	8.206	24.097	9.354	5.433	10.117	15.017
	10.581	12.852	10.613	5.461	4.569	13.707
	7.255	14.237	11.946	4.456	5.489	13.24
	12.309	14.049	12.079	5.955	5.319	14.323
	10.957	15.059	11.343	10.678	6.567	14.573
	13.195	18.343	15.081	5.052	10.028	12.689
	11.342	12.679	14.022	4.29	9.094	15.549
	12.386	12.644	11.825	5.601	13.249	11.826
	12.928	15.219	10.623	17.148	13.62	11.611
	13.358	15.861	13.761	12.021	5.095	11.521
	11.536	14.038	4.886	14.075	9.916	10.329
	14.184	14.257	11.982	10.626	5.692	8.265
	10.696	14.322	11.353	6.054	9.629	7.016
	13.948	31.379	11.094	8.211	6.71	11.096
	14.987	33.099	12.754	8.564	22.82	13.008
	13.094	13.946	9.992	12.774	9.764	12.716
	11.215	13.094	13.961	14.906	7.839	11.647
	12.409	13.188	12.511	6.654	9.015	11.646
	5.782	14.616	8.123	6.859	6.653	11.073
	10.681	14.284	9.693	13.326	7.03	8.733
	10.959	11.398	7.003	5.959	12.823	10.725
	7.397	11.795	6.301	14.565	11.229	12.873
	12.957	18.482	11.292	12.531	12.798	12.954
	13.067	9.468	11.716	16.963	6.151	16.694
	8.176	22.147	6.006	4.833	10.866	15.784
	10.368	15.051	6.215	6.98	10.011	4.366
	4.579	14.983	11.768	4.603	13.327	8.334
	10.266	12.551	10.757	6.23	8.817	8.601
	10.056	13.508	7.036	9.978	10.818	6.311
	7.872	12.836	8.651	8.586	9.677	11.707
	11.42	13.869	9.241	13.582	8.72	11.507
	12.192	18.255	8.716	7.812	9.699	4.84
	12.034	22.011	8.013	13.538	18.171	13.782
	11.564	29.008	6.054	10.795	5.089	14.033
	12.721	18.994	9.189	13.077	12.648	5.426
	7.709	10.844	7.514	11.451	12.966	4.428
	9.259	16.587	6.874	14.751	13.893	11.841
	9.587	12.306	8.608	7.525	11.822	12.89
	9.633	18.911	8.119	11.402	5.734	13.594
	11.876	15.385	11.011	8.293	7.4	6.808
	12.882	12.994	9.316	26.868	7.527	10.656
	13.52	16.019	12.154	10.913	5.774	13.373
	6.752	16.114	12.538	12.996	10.65	4.368
	13.895	15.334	12.454	5.483	5.17	5.793
	14.349	17.25	13.172	8.472	6.291	11.445
	12.577	15.615	11.524	7.661	9.266	5.167
	12.401	16.438	5.991	8.388	4.959	11.949
	14.111	15.504	8.65	17.722	8.217	7.151
	10.944	28.736	6.562	15.228	5.611	14.791
	13.357	11.459	8.642	15.322	7.464	14.695
	11.096	14.977	8.573	5.803	8.614	13.704
	11.458	21.143	7.251	9.109	5.224	7.863
	14.506	13.14	9.827	10.284	5.549	7.699
	14.66	35.36	9.604	9.947	11.42	6.408
	10.021	11.277	8.45	13.691	5.27	4.967
	13.294	31.605	8.207	4.914	5.77	6.677
	12.723	22.488	11.015	16.248	8.315	12.697
	13.991	14.728	9.45	13.561	9.333	13.896
	14.393	18.079	10.252	4.527	6.325	13.331
	13.98	24.125	10.536	11.25	6.562	18.079
	10.427	15.034	16.216	12.124	5.189	12.923
	13.614	14.938	14.311	9.108	8.251	4.119
	13.568	19.665	10.024	5.795	11.712	8.14
	11.143	13.564	13.287	12.311	12.448	10.479
	13.594	15.28	9.752	5.509	11.876	10.937
	13.748	32.195	5.983	4.471	10.625	4.692
	11.287	14.046	11.342	5.624	8.29	4.997
	11.776	18.03	12.383	16.996	7.356	8.007
	11.939	14.339	8.656	5.804	5.866	5.682
	12.471	10.499	13.127	10.137	10.528	9.768
	6.449	10.208	9.851	12.408	20.002	8.704
	6.275	15.369	9.165	10.941	12.908	8.385
	7.427	14.716	9.482	13.806	11.355	9.353
	10.218	14.093	9.243	25.066	6.321	8.463
	9.035	14.525	9.9	6.029	8.55	12.512
	12.916	20.184	9.336	13.32	11.241	6.009
	8.394	17.42	6.872	15.282	8.881	4.307
	14.964	16.011	5.518	6.642	8.279	23.241
	15.298	16.259	6.28	10.511	11.597	16.523
	14.786	15.445	9.696	14.681	11.689	12.168
	8.171	16.895	9.527	15.351	6.262	9.084
	15.586	14.429	10.436	12.291	10.855	14.151
	6.945	12.875	9.978	14.907	5.632	4.707
	12.993	16.162	12.347	13.159	34.734	16.479
	9.688	10.386	10.04	5.421	35.746	15.021
	10.578	10.186	7.577	12.054	13.39	14.78
	7.296	10.274	7.378	11.135	11.84	5.685
	6.744	11.408	6.245	10.567	14.44	32.728
	6.686	15.24	6.454	7.093	13.578	14.003
	8.953	14.428	6.893	10.498	16.669	13.104
	15.687	25.329	7.103	4.343	7.403	9.344
	8.01	19.689	11.742	17.181	12.004	12.78
	8.432	50.524	10.203	5.003	8.643	12.617
	10.629	45.953	7.362	7.559	12.92	5.006
	14.823	30.628	11.814	9.666	7.726	11.528
	15.21	36.555	11.083	5.915	9.109	14.33
	14.413	11.766	10.036	14.876	6.589	20.829
	10.404	21.433	12.38	5.033	13.681	8.917
	5.486	14.251	11.011	12.8	6.515	6.521
	13.787	12.194	9.089	14.397	8.725	9.057
	9.985	14.022	9.269	13.605	6.861	19.136
	11.423	10.252	6.042	5.086	5.543	10.852
	13.308	11.923	8.844	10.109	4.657	14.997
	10.641	12.109	5.148	10.532	10.884	11.73
	12.502	12.881	8.325	8.812	13.713	7.625
	14.421	14.797	12.67	20.769	11.599	12.275
	11.324	15.843	11.755	5.081	12.389	13.301
	11.531	13.297	10.084	13.983	6.939	4.982
	13.757	23.107	4.911	19.526	5.477	15
	8.152	21.259	14.017	12.151	8.008	7.579
	5.034	13.982	11.893	10.153	5.639	10.146
	7.2	15.501	6.884	7.968	10.768	20.691
	12.292	15.638	5.851	12.636	5.89	4.319
	8.593	13.076	6.314	11.442	10.384	8.02
	12.305	24.52	9.504	13.284	6.046	13.876
	8.822	10.541	11.582	10.569	12.706	6.327
	6.025	31.856	13.273	10.934	9.234	8.116
	15.437	22.628	13.201	9.102	13.95	12.634
	12.52	15.75	10.441	11.982	10.638	12.06
	8.731	14.791	6.07	7.044	5.763	12.328
	8.414	16.406	11.156	13.135	12.452	12.176
	7.178	9.182	7.821	6.345	5.067	12.955
	5.491	9.314	12.251	11.833	12.042	5.218
	13.086	9.552	8.039	12.948	10.576	14.64
	7.165	9.084	7.14	8.965	9.066	11.183
	12.116	17.765	6.924	10.342	11.709	13.33
	5.568	15.727	7.526	9.356	11.364	12.38
	14.816	16.713	9.17	13.475	8.973	6.602
	7.855	12.34	8.825	4.35	5.47	6.173
	14.011	13.498	10.312	12.605	5.676	13.091
	9.351	17.716	12.451	13.269	7.153	11.189
	8.656	15.104	11.78	11.053	6.796	12.038
	16.53	22.58	11.865	4.574	13.238	10.364
	9.529	20.514	5.996	5.231	12.24	12.632
	4.615	21.842	11.45	9.586	12.59	11.845
	10.489	10.089	10.891	5.926	8.289	11.655
	8.215	10.564	7.617	9.24	4.629	13.908
	8.087	11.519	11.015	11.074	10.73	6.65
	6.083	13.893	8.849	7.996	5.974	12.068
	12.748	13.438	9.518	5.237	6.098	10.57
	10.252	13.033	5.792	14.222	9.485	5.053
	12.222	14.518	8.739	7.688	9.231	10.668
	10.417	9.677	5.947	9.446	12.444	6.867
	10.478	12.845	8.619	5.212	7.465	8.771
	9.125	14.933	9.309	4.442	8.647	9.764
	6.678	15.896	11.36	6.631	5.639	16.674
	11.587	16.822	9.304	5.764	6.315	13.571
	5.986	16.003	6.931	6.797	9.256	14.21
	6.886	12.683	10.259	5.738	8.305	13.158
	12.463	16.591	9.261	13.339	5.247	10.15
	12.864	21.084	10.038	8.95	8.462	11.491
	37.439	13.425	8.573	6.131	12.482	11.229
	32.708	10.808	8.891	10.785	11.101	8.124
	5.14	14.732	9.1	8.314	12.163	19.233
	13.487	18.578	10.125	14.506	7.955	19.911
	10.502	9.749	5.262	8.568	12.928	12.531
	13.002	16.663	8.055	10.779	6.057	11.296
	14.898	15.938	10.114	12.331	13.295	12.457
	13.865	15.11	7.281	17.933	5.438	9.485
	15.229	14.437	10.677	4.701	5.116	8.222
	12.744	15.939	8.181	12.492	11.323	9.749
	12.223	13.912	10.242	5.78	11.537	4.953
	17.355	10.545	10.364	8.56	13.025	6.714
	13.237	17.379	9.26	12.281	11.786	5.337
	11.71	22.454	8.441	15.719	10.184	8.315
	6.46	16.121	9.533	8.088	10.304	13.997
	12.681	10.557	7.36	9.052	10.655	15.719
	9.52	12.917	9.707	4.777	6.558	15.892
	10.215	15.396	8.371	13.122	10.061	14.355
	13.712	14.218	10.984	4.351	9.258	11.006
	14.328	10.168	7.819	4.676	4.926	4.323
	11.495	11.043	10.442	10.079	5.402	5.167
	13.304	13.899	8.592	8.829	9.241	12.838
	11.69	15.972	5.668	9.142	13.564	13.022
	4.858	11.724	6.042	5.552	5.863	6.1
	9.054	14.965	9.53	16.336	10.343	13.921
	5.408	13.063	10.154	5.379	7.669	5.142
	9.92	15.561	10.321	7.33	11.403	11.939
	12.293	12.571	10.397	12.925	13.637	11.324
	12.851	9.881	5.68	11.315	6.416	10.918
	10.073	11.875	7.929	14.589	7.738	12.391
	5.216	10.201	8.675	5.051	12.545	12.167
	6.614	13.757	8.761	5.858	12.495	12.403
	7.297	13.122	8.4	13.998	14.091	14.163
	12.305	14.196	10.49	11.538	11.65	13.338
	12.861	10.764	11.273	13.138	5.998	14.024
	12.992	15.784	12.196	6.749	8.514	12.942
	11.581	14.252	6.663	8.623	6.681	13.409
	7.446	11.062	11.976	5.642	5.912	12.859
	11.372	13.861	12.8	12.074	4.715	4.953
	9.044	13.202	9.293	7.749	4.382	13.536
	13.644	13.036	8.172	11.227	5.663	4.924
	8.714	15.974	8.805	8.079	5.536	11.056
	6.564	13.476	5.673	19.069	12.79	10.899
	12.275	17.146	5.974	12.446	11.674	11.047
	12.708	20.222	6.851	12.961	12.336	10.677
	10.087	14.646	11.883	10.488	5.598	11.603
	10.386	16.77	8.124	4.92	12.809	11.057
	9.613	15.319	12.402	5.631	8.999	5.197
	14.301	8.758	11.126	17.917	6.921	12.86
	15.137	11.526	13.443	5.311	15.008	5.043
	14.999	15.211	13.69	11.633	12.614	9.877
	13.037	16.819	19.031	4.549	11.742	13.77
	9.841	16.186	10.567	5.63	11.106	9.28
	5.822	14.306	9.718	8.974	6.204	11.323
	12.794	42.762	8.992	8.956	5.804	12.042
	12.127	15.375	12.419	7.343	11.888	4.466
	7.454	10.395	9.12	5.511	6.238	11.576
	10.189	8.14	9.639	10.25	9.319	12.344
	11.797	13.96	10.695	8.408	13.628	5.966
	9.122	13.288	8.512	9.551	12.185	10.025
	12.167	13.619	13.199	4.673	7.919	8.811
	10.56	11.083	9.646	4.125	8.295	6.17
	17.558	15.619	6.774	11.498	11.094	6.76
	15.366	12.141	12.136	16.254	12.003	6.497
	12.971	13.881	10.447	12.627	5.908	7.949
	13.21	12.538	5.895	4.876	6.906	10.355
	13.946	9.313	10.785	9.169	7.371	12.061
	14.324	36.9	10.654	10.369	8.46	11.267
	13.305	17.77	10.663	5.735	13.209	12.921
	9.241	16.874	6.115	9.42	14.727	12.945
	8.734	37.746	11.52	14.221	13.459	4.623
	4.94	13.956	8.327	9.456	8.581	10.221
	12.324	10.243	12.092	9.707	9.267	8.966
	11.821	10.577	10.131	12.645	13.761	13.508
	13.374	14.865	10.823	9.847	10.58	12.498
	13.798	12.546	8.07	9.67	8.555	9.609
	12.622	10.031	6.722	5.499	13.307	5.128
	8.316	15.346	5.724	8.156	5.185	17.617
	8.357	11.639	8.612	12.584	7.735	9.848
	12.356	12.225	8.934	13.874	11.658	15.833
	11.92	16.402	7.751	13.629	11.794	7.194
	8.318	16.686	9.242	9.708	8.804	16.256
	15.492	16.984	12.974	9.956	10.165	13.074
	11.338	20.4	8.747	12.983	14.05	12.862
	11.044	31.527	9.31	12.312	6.634	12.44
	15.556	12.873	6.245	18.373	12.579	12.32
	9.765	13.801	6.385	17.161	6.271	12.241
	11.443	11.962	6.307	8.88	10.504	9.487
	17.672	12.264	9.964	9.593	13.61	9.269
	12.597	14.737	9.312	12.921	14.015	13.87
	8.091	9.977	9.302	9.872	12.385	11.933
	8.573	13.521	9.847	12.516	6.819	11.5
	9.289	10.274	10.202	4.929	6.793	11.884
	9.96	27.262	8.991	4.449	10.556	9.283
	6.512	16.587	10.006	15.057	11.526	11.583
	7.59	16.052	7.509	12.082	8.507	15.461
	10.957	11	11.909	6.563	7.403	9.515
	15.342	21.795	7.463	13.738	5.859	13.25
	11.011	15.541	6.149	6.246	4.693	12.643
	11.359	17.198	7.105	10.557	10.587	12.912
	12.642	16.153	7.561	11.881	12.247	12.945
	13.224	8.511	5.724	11.085	8.556	11.316
	13.423	10.287	11.025	11.536	13.31	7.301
	13.498	11.298	8.466	11.832	17.273	5.875
	21.15	13.009	9.055	5.627	6.632	15.991
	13.592	14.49	9.063	4.386	5.451	18.694
	13.513	16.383	11.249	7.151	5.648	8.715
	5.324	9.413	16.767	8.186	5.567	8.94
	8.189	14.118	17.216	13.677	5.563	8.988
	12.161	18.124	17.41	12.281	5.021	6.164
	11.805	16.726	13.236	16.238	9.637	11.766
	15.251	14.03	10.848	14.328	12.444	11.811
	4.778	12.698	12.513	11.133	13.572	12.49
	16.225	13.584	9.738	6.071	5.658	13.662
	14.339	14.424	8.29	13.321	12.818	13.638
	13.517	18.755	13.668	12.356	10.083	13.08
	13.144	13.725	12.644	17.702	8.612	13.851
	12.717	12.15	12.096	10.557	5.728	14.177
	13.914	10.477	12.599	9.447	6.441	12.76
	11.669	10.477	12.894	6.173	4.62	10.75
	12.764	14.836	10.904	8.61	9.887	12.77
	4.813	13.457	10.112	11.492	12.589	9.519
	10.818	11.703	10.684	14.99	10.283	10.692
	13.098	15.523	10.367	9.862	9.609	9.449
	13.067	15.4	11.015	17.003	9.093	12.783
	8.538	11.028	9.959	15.355	12.792	13.385
	9.478	10.307	11.037	13.687	13.603	10.758
	10.111	6.212	11.039	4.842	12.235	8.567
	8.686	11.566	12.316	9.978	12.9	8.415
	7.332	13.156	11.046	5.644	13.371	12.745
	11.157	9.345	7.245	5.59	11.218	12.544
	7.322	14.037	4.645	7.445	11.336	12.999
	16.973	12.028	11.363	13.111	10.611	9.139
	13.446	11.705	7.988	6.256	10.703	10.022
	12.892	11.868	10.438	9.734	8.666	10.547
	8.656	18.355	12.136	16.74	6.631	12.124
	12.004	9.47	12.833	4.935	6.887	10.445
	12.921	14.147	10.715	8.095	5.539	13.575
	13.627	7.077	10.275	10.794	8.841	7.22
	10.88	13.077	5.778	9.123	8.183	6.294
	11.806	9.711	4.87	8.77	10.418	5.492
	8.102	15.1	6.489	14.676	11.701	12.257
	12.457	19.215	5.794	14.999	13.69	6.105
	12.923	13.685	10.589	6.581	8.169	11.325
	7.682	10.889	8.416	11.056	12.264	7.788
	6.528	11.079	7.651	6.406	13.67	9.754
	8.028	13.201	10.026	12.558	5.473	12.763
	8.829	13.633	11.966	4.267	8.062	14.378
	7.272	12.386	6.683	5.816	6.21	13.792
	7.48	12.997	6.61	16.405	11.292	5.201
	11.858	13.619	7.762	4.368	10.02	11.11
	12.359	12.963	7.919	5.496	9.32	6.262
	13.173	17.308	7.447	4.604	7.894	11.461
	12.089	23.295	10.316	6.604	12.341	12.605
	17.497	23.586	9.922	5.578	9.051	14.867
	15.538	15.031	9.144	14.925	12.304	8.897
	15.156	16.39	5.813	12.474	7.033	8.227
	15.561	15.639	7.074	14.626	13.78	13.362
	12.975	15.542	9.175	12.319	11.269	13.146
	9.492	14.019	11.545	12.001	9.179	9.459
	11.131	10.64	8.677	13.232	11.204	7.083
	7.593	24.468	6.442	9.552	7.879	10.744
	10.71	13.645	10.501	5.017	7.381	13.864
	18.106	12.448	9.65	10.104	8.351	12.211
	10.218	7.764	10.39	5.964	9.255	5.837
	10.557	12.131	12.071	6.579	5.037	13.088
	9.266	15.846	5.956	14.395	12.47	12.25
	13.632	14.037	10.193	7.491	5.318	10.902
	13.368	17.724	5.564	6.795	4.882	14.046
	12.743	13.416	7.386	10.965	6.19	10.16
	42.643	15.047	12.932	12.809	14.132	12.51
	16.759	11.508	11.207	22.021	7.814	8.023
	11.063	12.483	12.311	10.836	14.152	22.197
	9.821	8.488	11.991	14.046	13.621	11.626
	13.462	12.842	8.655	13.443	11.604	12.137
	14.096	10.42	9.021	13.229	6.504	5.492
	9.933	9.62	10.693	13.063	11.18	10.69
	5.411	12.695	8.713	24.634	10.098	14.351
	15.83	13.984	8.837	6.634	11.887	9.335
	14.545	10.243	7.351	9.939	11.886	9.572
	5.664	15.183	10.913	16.804	11.175	5.164
	14.206	9.08	10.484	19.116	8.043	5.871
	11.246	13.477	6.013	7.814	7.626	15.104
	7.813	10.035	11.899	12.068	13.29	14.594
	12.972	11.884	11.135	16.133	9.967	12.953
	13.138	13.11	13.212	10.721	14.409	11.346
	14.751	16.402	11.662	12.614	13.245	10.33
	7.83	13.497	14.964	15.999	12.484	13.536
	7.474	13.564	11.31	5.423	12.307	6.48
	10.74	12.687	7.174	7.795	5.056	17.432
	8.752	10.489	6.531	14.608	7.333	9.742
	8.448	12.455	8.978	15.043	7.485	12.861
	10.418	12.13	10.319	5.177	5.96	13.955
	12.227	12.254	10.307	7.772	8.874	4.76
	10.345	14.087	10.263	12.244	4.494	13.766
	13.313	35.646	10.221	7.337	12.069	11.344
	10.93	13.633	8.391	16.621	12.113	13.106
	9.479	10.6	8.526	12.1	14.002	11.204
	10.747	12.189	13.395	9.831	7.331	10.796
	13.873	11.501	13.136	5.253	7.511	10.721
	13.281	12.815	10.791	5.515	11.029	13.509
	15.582	11.06	8.615	15.468	8.568	11.954
	13.455	8.736	8.516	15.888	12.325	9.603
	14.174	9.524	10.138	6.818	13.983	15.034
	12.988	11.493	11.305	8.776	12.449	12.33
	13.223	13.257	10.04	12.294	5.065	16.44
	13.012	13.663	11.704	14.979	10.732	13.029
	12.773	13.006	13.677	8.326	11.781	13.789
	12.25	18.017	6.655	11.257	8.629	17.156
	8.701	14.638	10.416	12.538	12.214	12.821
	10.565	12.472	7.529	11.314	12.341	14.2
	13.843	12.586	9.765	14.051	13.02	13.541
	11.581	13.407	8.477	16.078	12.762	13.292
	9.76	12.752	7.831	13.857	11.882	8.752
	14.862	12.115	7.554	9.799	11.488	10.557
	15.845	11.155	10.451	10.44	5.276	6.508
	11.101	13.085	12.489	10.77	9.42	14.035
	7.435	14.951	10.941	16.188	12.032	14.384
	11.377	11.368	9.815	11.346	11.077	16.78
	13.052	12.087	10.154	14.316	12.507	14.71
	12.823	11.07	11.123	17.449	12.615	12.797
	7.054	13.204	9.463	10.361	5.252	14.128
	5.918	15.567	11.56	12.349	13.602	5.164
	12.401	12.316	13.548	4.544	12.473	7.329
	13.765	16.269	14.166	11.687	4.634	9.097
	12.886	11.334	13.1	13.479	12.864	5.932
	11.042	12.732	12.404	11.511	12.842	11.275
	12.42	13.914	12.316	10.838	12.978	12.242
	11.053	11.736	7.149	9.901	7.505	12.603
	12.049	15.082	8.044	7.63	7.212	16.493
	11.029	10.207	10.404	6.851	11.739	6.213
	12.339	17.515	11.544	11.548	10.684	14.832
	12.62	10.225	12.204	5.268	8.636	12.471
	7.069	12.221	8.969	15.497	14.435	12.499
	6.995	13.945	7.692	21.428	11.927	13.935
	10.609	14.808	9.749	4.902	14.482	13.414
	10.733	12.142	7.559	9.718	9.986	10.962
	12.199	11.478	7.379	11.691	5.32	11.595
	11.212	12.267	5.594	8.974	8.509	11.273
	9.005	12.196	8.441	12.775	5.344	13.751
	12.3	11.745	9.247	12.748	13.188	13.184
	14.139	13.63	5.554	14.181	7.748	13.837
	12.09	12.788	10.995	6.337	13.042	13.572
	13.644	13.932	11.393	12.566	13.018	13.611
	8.765	10.741	11.527	11.011	13.364	10.568
	13.339	9.125	9.029	12.242	6.266	20.018
	12.383	14.302	8.509	9.451	7.709	6.278
	12.995	12.98	9	15.51	6.515	6.974
	11.512	9.562	7.983	14.184	11.992	10.063
	13.635	13.351	8.837	11.287	14.75	5.731
	11.837	14.736	8.492	14.026	14.006	6.577
	10.789	11.344	7.32	11.879	12.558	13.58
	8.969	13.692	10.368	14.57	9.594	11.069
	12.333	16.528	10.595	12.087	12.768	12.699
	10.29	12.861	10.723	9.275	13.636	11.148
	12.634	13.012	9.278	19.981	12.606	13.328
	25.449	14.849	9.394	8.557	12.751	13.774
	12.446	14.019	8.77	8.045	10.401	13.319
	12.051	10.943	7.032	6.932	16.268	11.423
	5.157	10.677	9.629	19.134	15.257	11.912
	12.138	10.626	9.344	13.357	14.384	13.705
	8.944	16.462	8.372	4.658	4.869	11.748
	12.852	16.599	10.037	13.142	6.912	13.522
	13.088	11.855	10.089	10.067	5.389	13.62
	13.711	9.953	9.506	6.555	7.105	11.885
	12.638	10.017	7.454	7.644	7.883	13.58
	13.672	12.9	10.378	7.897	6.011	7.937
	9.111	14.617	12.533	9.522	5.958	9.618
	12.754	16.31	10.305	11.447	6.968	9.844
	10.915	14.266	11.718	12.736	6.125	13.759
	6.728	10.818	8.495	14.606	11.07	6.259
	10.691	9.375	7.765	6.106	8.655	5.629
	10.895	14.797	10.779	10.189	11.678	10.125
	12.832	14.354	9.573	11.527	12.168	14.314
	14.267	15.33	10.59	11.919	10.688	12.443
	16.739	15.702	10.374	10.794	11.806	5.108
	13.949	14.092	8.349	13.781	12.057	12.895
	9.598	13.88	11.363	4.658	8.714	9.418
	15.546	14.765	12.327	4.65	10.059	11.644
	9.144	15.913	12.735	6.822	14.899	8.895
	10.238	9.66	10.614	11.246	13.529	9.949
	10.29	12.103	13.018	19.942	7.609	11.651
	6.651	16.148	12.262	19.826	8.237	12.919
	11.344	11.345	12.069	13.212	8.372	11.66
	7.974	19.311	10.063	6.178	11.878	13.222
	13.521	12.625	10.853	13.604	6.931	10.373
	10.956	14.071	11.025	16.982	13.043	12.198
	15.778	11.859	12.283	14.081	9.319	14.42
	11.915	7.384	12.491	35.504	5.311	8.272
	8.343	9.194	11.289	31.216	5.019	5.883
	8.368	10.098	11.843	10.432	12.49	5.655
	12.106	12.515	18.338	5.63	7.298	7.012
	12.277	14.181	27.031	12.552	11.148	12.893
	9.892	13.927	13.882	13.455	7.005	14.248
	10.684	21.391	9.315	16.846	11.232	18.386
	15.633	34.483	9.461	13.552	16.641	14.048
	9.538	35.65	12.266	8.066	8.101	13.225
	9.417	13.499	10.984	8.088	10.632	18.061
	13.469	13.713	12.719	15.451	7.216	7.786
	11.336	10.822	10.567	12.915	12.443	15.773
	12.946	12.124	6.24	15.929	12.675	13.118
	13.193	14.152	10.269	9.726	13.324	13.888
	12.627	18.723	7.449	12.936	6.152	16.343
	13.207	17.826	10.816	13.123	5.517	13.986
	11.648	12.762	7.718	7.24	9.562	10.453
	11.617	14.356	11.708	11.184	11.79	12.607
	13.389	15.596	7.359	13.331	6.194	10.162
	12.887	12.106	11.953	7.531	11.143	13.763
	11.244	13.657	13.618	10.553	14.507	11.972
	10.209	12.365	46.592	5.418	7.27	11.136
	12.207	13.269	40.232	12.375	8.216	7.906
	11.002	14.38	9.054	13.728	5.153	13.868
	12.85	10.169	11.311	4.858	10.532	12.459
	13.588	9.004	6.864	4.829	8.543	11.838
	12.497	10.286	7.423	11.273	8.41	11.039
	13.574	14.1	24.935	15.4	5.396	10.442
	11.855	11.201	22.255	5.454	12.927	9.824
	11.608	13.153	10.244	8.342	20.203	12.758
	11.088	14.68	9.763	13.316	5.152	17.307
	11.76	12.883	8.997	5.625	9.786	14.099
	13.531	11.895	12.065	7.628	5.07	4.391
	9.51	13.175	11.352	12.58	9.142	12.534
	10.427	10.53	10.826	12.852	13.612	11.542
	6.707	12.871	10.254	10.355	13.345	13.151
	5.05	12.328	13.011	7.459	11.635	14.314
	7.497	9.248	11.495	13.299	13.841	13.97
	12.017	13.086	10.868	11.966	12.1	13.679
	18.478	14.945	8.976	14.684	6.315	5.02
	4.588	14.289	9.002	15.138	4.85	12.527
	13.406	11.509	5.644	15.844	5.394	12.319
	12.217	14.233	5.754	6.511	7.412	11.299
	13.35	13.082	10.761	14.518	5.87	10.929
	13.053	11.121	11.523	17.398	5.741	13.037
	15.874	17.767	10.993	12.29	9.502	8.859
	10.623	17.019	7.602	12.862	6.313	7.197
	13.208	13.304	6.499	7.923	5.923	13.945
	15.135	13.012	7.152	12.012	9.604	10.362
	12.194	8.094	7.162	14.674	9.557	12.102
	6.364	12.003	8.851	13.372	11.712	7.33
	13.059	14.888	10.502	14.524	8.462	7.479
	10.697	11.701	19.191	10.775	6.816	9.047
	14.322	14.201	12.97	16.125	10.926	13.81
	14.547	11.261	11.257	11.862	13.936	18.574
	6.375	14.205	11.486	7.424	14.494	13.985
	13.939	11.117	10.826	6.429	13.063	12.26
	15.324	12.281	11.635	11.681	5.967	14.337
	14.793	11.294	11.139	10.633	5.789	13.237
	17.856	12.933	12.94	9.394	10.077	9.956
	14.166	13.744	8.832	13.428	6.382	12.485
	11.908	13.219	6.561	12.369	5.994	14.818
	12.868	12.734	6.961	9.534	4.585	13.005
	12.395	7.463	7.082	9.07	7.278	11.956
	13.643	8.928	13.437	11.638	7.816	13.842
	10.135	13.856	17.026	11.644	15.052	8.833
	13.078	12.644	12.058	6.504	15.083	10.527
	9.594	15.082	11.402	16.081	10.71	7.824
	10.636	13.026	10.931	17.263	8.046	11.564
	10.672	17.028	11.252	9.702	11.788	16.071
	12.48	12.114	11.67	10.236	11.647	14.106
	13.616	13.885	11.746	9.102	12.143	13.684
	14.908	13.457	5.475	5.569	6.171	15.026
	12.978	13.589	7.926	6.901	8.158	13.394
	12.077	14.308	10.032	5.54	7.401	14.242
	12.702	13.429	12.034	4.92	13.594	8.124
	15.654	12.399	10.583	8.877	6.496	11.989
	12.829	10.759	11.899	11.61	6.414	7.321
	15.178	14.197	14.868	13.385	11.641	13.012
	11.967	13.263	11.166	22.077	10.328	14.074
	6.298	12.314	8.607	10.35	6.508	13.116
	8.767	18.111	10.736	10.241	14.436	13.981
	5.674	13.237	12.391	7.435	14.86	4.83
	13.56	32.948	8.294	12.766	15.386	10.957
	12.403	30.426	8.32	10.206	12.988	12.323
	12.402	18.38	8.939	6.495	10.261	10.5
	12.901	14.133	9.924	11.262	7.714	12.055
	12.844	15.565	13.847	5.394	9.441	12.668
	13.274	12.033	10.201	11.58	7.134	10.189
	12.803	9.535	8.886	11.577	13.402	12.872
	14.975	31.506	11.148	13.447	23.318	13.383
	14.4	47.16	8.319	10.952	28.978	13.012
	12.41	11.246	11.77	10.964	12.124	13.145
	12.564	14.642	9.487	11.592	6.713	13.375
	13.465	13.374	12.164	4.931	12.656	12.355
	11.945	14.595	12.287	13.83	9.605	12.517
	12.225	16.846	11.65	6.353	14.717	13.46
	13.343	13.323	13.662	13.076	4.701	12.128
	14.153	10.144	11.748	13.46	9.363	13.798
	13.545	14.091	6.86	8.233	11.471	11.809
	8.536	13.561	7.251	7.033	7.396	10.887
	12.889	17.599	6.718	14.431	10.379	10.054
	11.413	11.985	9.537	11.653	7.377	6.452
	13	14.24	8.657	12.204	9.923	14.531
	9.138	12.474	6.685	13.452	8.387	14.421
	12.311	40.367	5.201	12.956	10.394	13.561
	7.694	13.517	12.517	8.731	9.495	13.565
	10.416	14.325	10.352	13.431	14.753	10.717
	11.45	12.031	5.047	5.107	6.129	12.1
	7.574	17.166	6.178	4.642	9.244	12.756
	11.936	15.302	6.569	10.244	11.493	14.34
	11.634	11.423	9.939	12.721	9.143	13.793
	13.831	19.873	8.182	4.443	12.062	14.145
	14.562	16.151	6.099	12.809	11.946	11.871
	11.498	14.21	6.854	10.685	9.697	13.544
	12.78	13.076	9.588	12.737	8.14	12.528
	11.35	10.224	12.141	15.985	12.337	13.434
	8.765	16.344	10.271	13.295	6.357	12.395
	11.838	10.117	13.984	10.666	12.544	10.008
	13.226	14.331	9.992	12.494	5.136	13.758
	16.323	13.599	5.061	11.251	5.533	8.806
	16.8	13.214	10.596	13.052	9.644	12.749
	17.809	20.72	9.867	11.905	7.688	5.92
	11.643	20.848	8.879	6.305	10.514	6.784
	14.603	13.95	10.334	6.529	10.58	8.221
	13.165	16.283	10.513	13.008	6.727	7.098
	11.3	16.585	11.953	11.29	6.76	8.77
	12.799	12.036	10.952	11.518	7.614	10.648
	13.318	13.373	10.774	7.034	10.976	8.195
	13.469	13.865	9.574	15.698	10.139	14.928
	21.749	12.985	7.776	22.766	7.739	6.987
	19.227	13.705	8.345	17.453	5.929	16.221
	8.387	16.359	10.189	13.001	14.432	5.96
	10.771	12.489	7.588	14.385	5.842	4.899
	9.817	18.523	11.174	15.836	16.955	11.797
	9.043	12.455	11.627	7.269	5.861	13.924
	13.885	11.896	5.633	10.154	12.655	14.059
	14.753	13.084	11.738	13.581	12.25	13.506
	12.33	18.518	11.758	12.903	13.966	12.348
	9.37	14.278	11.941	13.055	6.033	12.162
	12.887	16.039	7.739	18.604	10.732	11.314
	11.89	15.526	10.589	14.41	39.165	6.334
	12.437	16.492	12.144	6.72	9.752	12.604
	28.238	13.695	8.542	9.453	11.912	11.79
	16.499	10.65	10.125	6.704	9.8	12.784
	14.132	14.34	12.743	8.59	18.113	9.927
	14.013	15.952	14.244	11.154	12.049	11.447
	15.001	12.361	11.242	11.607	12.143	12.376
	14.527	18.689	26.005	15.568	12.674	11.756
	11.965	15.49	37.598	20.591	6.047	11.918
	8.668	18.23	7.938	14.653	9.286	12.67
	17.195	13.706	7.451	12.374	4.648	13.949
	13.239	13.803	7.723	12.817	11.044	10.229
	11.915	15.613	8.234	15.163	11.084	11.504
	5.485	8.872	6.266	8.211	11.074	12.647
	11.128	10.484	11.287	13.859	12.777	12.009
	10.965	13.029	11.665	13.533	6.101	12.867
	10.921	11.141	12.188	10.662	6.722	8.586
	12.686	49.282	9.677	12.983	8.781	5.764
	12.762	43.63	9.947	14.992	10.754	13.532
	10.935	15.63	7.065	13.486	7.368	13.364
	12.959	12.775	8.389	11.474	11.091	13.782
	9.098	29.71	10.03	5.984	12.855	13.083
	12.999	23.703	7.56	12.654	13.726	14.044
	14.302	13.316	8.547	12.731	5.813	20.974
	12.736	12.121	12.431	11.332	6.13	12.887
	11.43	13.026	12.64	13.495	12.153	11.812
	13.154	9.236	11.93	14.308	14.422	12.713
	9.884	15.176	5.27	10.905	13.965	12.396
	14.441	13.903	4.988	9.412	6.291	12.863
	12.456	12.918	8.439	5.178	6.831	11.241
	9.98	10.635	10.621	9.667	7.524	13.161
	5.841	16.954	9.768	6.389	14.073	13.389
	7.29	15.433	9.946	5.739	13.475	13.417
	7.551	14.903	12.606	17.387	17.749	12.062
	12.691	10.464	12.594	16.979	14.395	8.195
	12.424	16.109	8.126	15.552	12.608	8.777
	12.879	8.312	13.658	14.621	13.393	10.608
	12.54	11.447	8.073	9.955	8.206	8.26
	13.604	8.36	8.657	13.225	13.828	13.325
	8.849	14.909	8.862	14.022	4.675	5.545
	13.148	11.519	8.233	22.245	5.333	11.516
	10.998	16.797	7.076	14.518	12.804	14.104
	9.619	11.348	14.185	13.571	9.206	13.359
	6.316	15.129	11.443	21.853	11.6	10.232
	17.798	10.528	10.399	16.127	11.121	4.72
	6.489	13.905	10.142	15.192	10.433	13.925
	13.684	11.516	6.308	12.11	5.451	10.195
	9.237	9.545	6.489	12.07	6.713	16.095
	11.009	24.45	5.864	6.712	5.542	12.652
	11.701	19.51	6.543	6.672	12.65	9.893
	10.68	14.605	10.041	8.495	12.839	11.401
	9.61	15.015	7.002	16.25	6.403	7.003
	8.413	12.125	9.024	13.536	10.104	11.264
	7.796	14.855	13.112	7.961	6.063	14.432
	6.301	13.492	12.773	11.727	5.853	10.723
	11.523	11.663	13.948	10.066	10.273	11.938
	13.936	17.37	13.984	12.522	10.938	8.774
	15.997	14.02	10.279	13.774	12.8	13.881
	4.639	13.182	11.672	6.474	10.057	13.539
	15.826	14.703	10.242	12.16	13.573	13.968
	17.414	14.416	7.816	13.375	10.869	7.193
	14.747	8.266	11.966	4.935	6.87	11.97
	18.067	11.905	9.545	10.072	8.492	5.846
	12.471	8.26	11.987	11.437	10.193	15.792
	14.604	23.113	8.923	5.631	7.344	14.067
	13.584	14.53	9.3	11.146	6.75	13.33
	10.784	14.754	11.075	5.983	13.461	11.906
	11.232	17.449	6.421	9.333	8.869	8.011
	14.654	15.994	9.769	5.618	12.551	13.756
	12.099	14.383	10.456	5.946	6.33	13.633
	13.898	13.586	9.058	5.532	13.201	11.893
	15.314	14.013	12.528	14.754	5.677	11.173
	11.581	13.277	15.158	14.856	6.824	6.629
	15	12.793	13.78	12.505	7.76	9.999
	13.241	15.243	12.821	12.294	6.271	9.302
	12.343	7.984	12.733	17.4	15.635	12.184
	13.555	14.829	10.32	16.809	13.183	10.502
	9.123	13.624	11.101	12.019	13.17	14.097
	14.155	12.325	10.366	15.807	13.302	12.912
	13.919	12.413	8.886	13.956	10.629	13.005
	12.28	15.976	9.415	5.822	10.996	12.3
	9.611	7.998	9.372	11.845	4.643	8.36
	14.545	13.097	9.851	8.595	10.548	12.219
	13.504	21.151	10.118	13.324	11.357	13.943
	17.631	14.093	9.49	13.154	13.916	9.544
	14.91	12.999	9.248	12.578	12.756	9.618
	10.573	15.117	6.982	12.103	5.691	12.999
	9.377	14.624	6.521	10.71	5.951	11.474
	7.831	20.617	8.145	12.742	7.878	13.499
	8.706	16.132	10.754	10.394	6.197	12.199
	10.268	15.493	14.195	5.743	15.139	13.732
	12.358	14.496	13.264	13.075	7.271	12.944
	7.85	12.795	11.242	10.518	10.864	12.681
	7.445	14.009	8.028	14.915	6.75	21.102
	8.68	15.917	12.743	5.778	7.498	22.669
	11.689	13.085	12.018	15.455	13.756	23.143
	8.585	12.545	12.339	12.037	12.883	15.466
	11.701	14.695	13.034	4.804	6.533	11.126
	21.545	14.107	10.77	11.001	12.56	11.752
	14.458	15.886	9.783	13.35	13.988	9.704
	7.53	14.808	8.855	11.352	7.906	9.344
	10.191	15.343	7.343	11.867	9.148	5.887
	12.886	8.635	14.47	17.436	7.201	12.031
	10.273	8.981	9.414	9.507	16.428	10.523
	8.842	11.723	10.018	10.059	12.536	13.029
	13.204	14.306	9.241	5.479	11.313	11.746
	13.933	13.665	12.275	12.531	13.486	12.276
	10.587	14.091	6.368	13.496	7.076	16.786
	7.404	12.654	6.782	9.846	6.296	13.181
	15.009	13.657	8.724	12.181	11.349	12.573
	12.942	15.484	12.407	14.228	11.325	10.533
	12.902	16.268	8.814	11.752	11.234	11.257
	12.281	15.606	9.026	12.167	9.666	14.937
	11.761	28.599	9.111	12.649	38.708	12.879
	10.297	13.56	10.389	15.079	7.228	13.205
	12.499	12.958	11.217	15.788	12.431	6.978
	13.755	13.803	10.692	16.526	11.781	5.646
	29.977	12.001	9.694	13.381	12.332	13.275
	14.489	14.323	10.436	12.576	14.733	13.389
	7.542	10.074	12.023	13.163	12.078	13.01
	11.789	13.792	12.479	12.211	5.56	13.72
	11.714	14.486	14.206	15.822	7.333	29.85
	10.35	7.379	11.085	12.583	6.819	31.133
	13.447	15.708	12.947	14.841	8.113	40.001
	14.804	52.077	11.569	14.394	12.458	20.936
	13.46	15.134	11.197	6.95	7.555	18.476
	10.243	9.874	12.234	14.153	7.746	12.775
	14.197	38.82	10.036	12.61	11.578	12.293
	12.12	27.789	8.276	6.408	12.127	10.229
	14.629	26.193	8.391	10.666	11.699	10.84
	13.182	14.722	10.692	10.67	6.497	6.718
	13.472	13.81	11.946	5.648	7.685	15.712
	12.466	11.69	11.681	7.941	11.785	12.297
	10.225	13.661	8.27	11.169	5.673	11.89
	10.897	13.527	9.549	12.054	8.176	12.749
	11.007	13.771	11.763	14.273	6.31	8.183
	8.977	13.911	10.001	10.632	12.522	14.606
	10.733	15.42	9.952	10.15	13.868	11.681
	11.594	14.633	6.305	11.023	8.364	15.405
	12.966	13.416	8.924	11.216	11	8.979
	13.532	14.198	14.898	13.455	7.884	11.818
	14.138	15.798	13.145	12.676	10.684	13.587
	16.597	12.619	11.448	11.673	9.464	12.424
	21.341	11.151	11.522	14.688	13.627	12.005
	12.938	14.556	8.04	9.041	8.185	8.62
	13.232	13.117	9.818	9.797	8.867	14.447
	11.26	14.497	12.248	8.006	11.142	9.727
	9.122	14.179	7.872	11.903	12.617	10.016
	11.465	12.732	16.16	7.194	12.324	12.871
	9.29	13.541	13.537	13.092	13.275	11.936
	12.779	11.018	13.121	14.363	9.294	13.149
	12.712	15.502	11.837	11.683	13.006	14.218
	11.399	12.168	12.13	19.954	9.123	5.663
	9.881	22.067	14.665	9.934	11.253	12.053
	14.392	11.093	12.737	15.667	11.504	13.331
	12.618	16.623	12.684	7.537	12.48	12.387
	9.186	13.461	16.251	17.054	12.472	9.557
	12.399	13.338	9.357	11.771	5.712	11.232
	12.613	12.14	13.038	12.837	8.62	8.297
	13.345	14.229	11.181	11.062	8.141	14.239
	15.18	21.335	7.944	9.03	6.452	15.341
	8.293	19.193	20.616	12.002	7.646	9.932
	16.832	16.907	10.387	4.353	9.621	7.713
	10.032	15.632	13.847	12.97	8.591	10.943
	11.058	13.644	14.493	12.485	5.45	12.952
	10.956	13.806	10.134	15.651	5.989	13.169
	8.32	16.45	13.241	21.44	8.625	12.321
	9.333	7.973	12.916	14.014	7.67	11.474
	9.457	11.189	7.267	11.896	8.496	7.268
	7.474	12.266	9.412	13.264	6.846	13.125
	8.549	11.193	6.35	7.595	8.951	11.722
	13.338	12.788	10.496	13.49	7.779	13.793
	10.617	15.275	10.271	13.628	13.133	9.912
	12.724	13.95	9.767	15.36	13.88	7.224
	11.041	14.102	10.361	13.463	12.215	14.121
	7.819	13.755	9.119	13.876	14.702	8.386
	9.686	13.634	7.064	14.309	6.775	12.062
	12.811	15.337	9.677	7.591	6.179	9.603
	13.174	17.324	11.872	9.587	5.824	9.015
	8.307	14.809	8.426	5.48	11.135	11.069
	11.344	19.101	5.088	14.81	12.926	12.898
	7.929	16.038	11.912	10.007	14.129	13.728
	8.264	22.592	7.941	12.197	5.267	12.387
	14.439	25.112	9.284	20.401	6.13	13.939
	12.405	12.173	11.232	13.759	8.89	17.778
	12.732	15.208	10.865	14.348	13.05	14.073
	8.472	16.095	10.978	12.225	8.579	14.473
	8.486	14.617	14.144	12.783	14.31	10.595
	12.544	14.275	8.114	15.737	13.618	7.902
	15.823	11.067	12.223	12.862	13.816	9.818
	13.724	14.234	7.103	5.483	7.941	10.781
	13.898	14.219	8.985	11.107	6.772	8.211
	14.369	16.943	8.148	12.108	16.109	7.725
	12.382	15.304	11.612	14.551	6.143	13.784
	13.469	14.879	9.772	11.29	11.008	18.76
	12.496	15.195	9.057	11.842	6.99	19.529
	14.987	11.557	9.094	11.762	7.75	11.734
	14.391	12.557	12.199	5.589	7.005	15.29
	15.06	15.306	10.299	12.723	6.605	13.978
	15.751	16.981	24.123	7.26	13.551	12.432
	18.188	11.003	8.943	10.206	12.788	5.778
	11.135	10.138	6.864	14.786	13.135	5.618
	10.131	17.459	11.331	22.502	9.847	6.296
	12.573	8.685	10.193	5.689	13.34	12.425
	8.419	15.488	9.088	9.571	6.608	15.874
	9.419	12.69	9.667	12.223	9.907	15.172
	8.965	15.119	11.258	8.784	13.646	12.991
	20.121	15.135	12.246	9.012	11.882	12.237
	13.602	13.786	8.68	14.093	9.638	11.972
	10.886	12.906	9.511	10.394	7.356	10.813
	14.18	14.234	11.741	13.284	11.563	19.242
	12.899	13.154	11.08	13.35	10.918	12.01
	13.398	13.361	7.475	13.828	9.974	13.199
	12.076	9.368	13.028	12.995	11.253	12.69
	15.164	10.29	7.734	10.282	12.022	12.325
	13.927	12.186	8.863	14.107	10.134	9.525
	9.657	14.744	15.696	5.838	19.467	8.167
	12.912	16.51	10.941	11.273	5.011	10.666
	14.204	11.893	13.124	12.894	7.413	12.397
	13.388	15.041	5.642	11.561	6.412	10.775
	12.939	10.119	9.916	16.113	6.722	14.606
	13.576	14.83	9.618	7.604	6.713	13.492
	14.573	10.442	7.846	10.038	5.73	10.163
	9.639	9.68	8.995	12.347	6.113	16.719
	14.73	12.658	9.467	17.956	10.962	14.358
	15.105	13.295	11.047	9.894	5.59	12.094
	10.546	13.566	10.604	10.085	6.913	6.809
	8.059	15.355	11.196	8.308	8.573	11.752
	14.162	12.884	8.378	12.676	6.188	9.901
	12.474	17.017	8.883	13.48	12.612	12.526
	8.969	15.279	10.035	6.436	13.236	7.695
	14.726	12.506	13.446	15.225	7.821	13.005
	15.02	13.9	5.976	14.819	8.259	14.502
	7.895	13.101	8.555	12.485	12.973	16.237
	10.24	14.494	6.423	5.139	10.821	16.927
	8.107	14.14	10.154	10.076	13.91	10.553
	14.045	10.298	10.144	19.501	12.679	12.744
	15.411	10.401	10.831	10.798	14.714	15.811
	12.504	16.593	12.166	4.429	13.138	12.519
	12.003	10.353	7.28	10.349	6.189	12.918
	19.97	13.625	4.768	14.281	5.267	12.816
	23.939	10.442	12.449	12.341	6.95	12.953
	11.495	11.242	12.717	5.309	11.509	11.319
	5.961	13.219	11.866	11.07	12.968	12.647
	10.863	13.121	11.258	10.4	10.587	13.19
	12.282	12.704	10.488	7.662	10.359	14.895
	14.95	12.172	7.376	11.86	12.152	14.54
	14.976	13.76	9.759	11.538	7.821	10.853
	15.503	12.739	8.434	12.701	12.527	11.256
	16.373	12.781	10.672	11.146	7.124	9.959
	13.224	9.691	9.461	5.866	5.382	12.752
	15.078	13.806	9.288	10.864	6.9	7.983
	8.387	15.545	11.987	11.222	8.568	16.335
	12.307	14.428	12.048	13.131	6.558	13.262
	12.115	14.043	11.353	12.957	7.398	13.897
	11.132	14.196	12.85	13.893	6.612	13.928
	17.739	11.407	10.203	12.72	5.926	13.212
	13.101	13.431	16.186	6.771	7.894	13.893
	17.376	15.252	8.633	10.731	6.318	7.163
	16.71	14.17	9.473	11.997	16.081	14.237
	13.292	49.775	7.539	14.105	13.78	16.351
	13.911	22.812	13.523	17.774	12.712	16.258
	14.632	19.757	13.27	10.243	40.041	14.834
	12.95	9.819	9.569	14.664	33.893	12.166
	10.233	21.509	9.205	11.452	42.321	14.044
	13.462	43.732	12.428	7.685	37.463	13.172
	11.389	15.459	6.883	9.726	42.031	10.913
	13.162	14.568	10.799	13.014	7.187	12.911
	14.025	15.273	7.653	15.608	6.407	11.482
	9.327	15.389	9.481	13.917	12.511	9.106
	12.078	14.069	5.27	15.962	7.167	17.216
	11.262	14.195	9.805	12.396	15.058	13.198
	17.397	13.78	10.373	16.057	12.64	13.481
	13.116	12.857	10.455	10.783	7.444	13.251
	13.549	11.296	11.231	12.413	13.13	12.286
	8.667	33.584	8.318	13.65	7.446	11.105
	12.699	9.425	8.015	10.163	11.274	5.201
	13.118	9.864	7.544	13.88	6.662	10.817
	12.278	12.93	6.341	13.633	12.762	11.752
	22.477	12.408	9.441	15.378	10.813	11.897
	28.161	18.216	10.837	16.103	8.258	12.201
	12.001	15.726	11.194	12.21	10.819	13.43
	12.062	12.742	10.393	5.174	7.289	12.429
	11.297	15.142	9.702	6.484	12.271	11.602
	18.065	9.912	8.052	17.049	10.949	11.868
	5.416	16.518	8.628	16.711	11.852	12.682
	10.171	12.409	8.907	13.87	11.494	11.543
	12.522	17.078	10.218	10.319	12.884	5.085
	13.71	33.424	12.458	10.542	16.879	4.608
	11.598	38.303	7.857	11.075	16.937	12.551
	12.134	14.993	10.454	7.358	15.89	12.558
	12.256	13.847	8.893	16.063	13.536	12.087
	8.885	12.174	9.969	6.094	12.174	5.684
	9.438	13.903	12.161	5.078	12.948	12.681
	13.828	10.264	12.179	16.728	11.197	11.065
	10.414	14.515	11.994	12.095	11.114	11.15
	16.062	14.058	6.786	18.342	7.126	12.317
	12.626	13.312	5.5	13.983	5.296	12.712
	11.069	10.744	7.309	8.024	7.254	13.563
	11.055	15.455	13.515	12.287	7.248	8.592
	12.51	12.96	12.086	4.643	8.049	13.754
	13.386	12.894	8.102	4.483	6.704	6.468
	12.584	14.489	9.918	14.189	11.855	13.226
	11.238	14.012	13.085	9.727	11.116	11.919
	13.495	13.345	13.201	17.176	11.547	10.546
	9.075	14.219	12.533	6.76	5.243	11.685
	9.162	13.647	11.511	7.522	12.669	12.598
	12.435	8.128	10.763	11.542	13.575	20.017
	13.405	18.568	12.843	12.369	12.041	9.225
	10.662	21.252	8.922	12.479	14.027	13.655
	10.141	17.347	9.829	12.805	10.572	13.51
	11.3	14.507	12.217	6.2	13.489	11.342
	16.597	16.126	9.184	13.937	12.547	13.192
	12.549	13.005	15.054	14.652	18.799	23.742
	10.176	14.245	10.2	18.707	13.857	5.503
	15.88	13.181	10.155	10.085	11.529	7.367
	14.286	12.891	9.183	13.007	5.537	8.295
	13.35	14.821	12.534	11.689	8.836	5.21
	12.963	14.081	11.108	16.796	5.16	11.537
	12.961	10.488	12.036	5.668	6.046	12.272
	14.524	14.849	10.309	5.138	12.199	9.262
	13.112	13.677	11.205	11.053	11.676	10.264
	11.979	17.631	11.616	7.801	9.322	10.807
	18.428	12.185	10.538	7.77	7.912	10.963
	17.527	10.989	12.633	9.027	7.368	12.915
	15.597	10.799	9.172	15.325	9.197	13.555
	13.642	13.568	10.267	7.826	6.292	9.464
	12.197	16.458	9.387	12.866	5.216	8.646
	11.362	12.638	8.139	12.842	5.937	12.571
	13.069	12.326	8.493	11.971	8.834	12.526
	14.333	11.046	14.372	9.089	12.947	12.373
	11.521	12.701	9.802	12.744	13.415	13.203
	8.53	13.026	10.498	11.851	12.843	13.941
	8.374	11.334	12.026	15.438	12.876	6.745
	16.77	11.068	12.658	12.7	15.112	8.461
	16.101	14.128	14.011	9.18	7.376	7.863
	14.064	12.313	8.011	12.274	5.341	12.763
	13.57	11.04	8.952	6.408	9.162	14.943
	7.456	12.126	9.599	7.277	11.366	9.179
	8.025	12.064	7.762	8.496	13.015	13.835
	13.555	14.54	11.72	14.281	7.77	12.711
	12.216	13.454	13.004	14.226	11.415	6.173
	15.255	11.895	10.918	10.395	13.901	10.027
	8.229	14.327	9.289	6.79	6.863	13.624
	8.949	15.378	7.171	9.979	13.933	13.722
	12.912	15.943	10.768	12.78	13.574	12.492
	13.751	16.815	8.271	12.376	7.828	13.131
	12.733	12.252	8.843	12.146	5.459	14.596
	8.405	13.935	9.568	10.68	7.568	18.772
	7.646	15.881	9.259	11.43	9.632	13.532
	13.6	18.674	9.462	10.572	6.711	13.35
	12.882	13.486	11.386	17.317	6.557	7.972
	14.511	13.806	8.861	17.64	5.742	7.557
	13.204	15.328	8.547	14.513	5.198	13.322
	13.409	13.269	6.817	10.433	11.365	6.891
	14.775	11.549	6.729	15.196	9.389	12.794
	8.189	16.192	6.308	14.046	11.83	11.78
	13.707	13.386	10.362	12.252	10.918	11.855
	13.165	11.834	8.589	12.45	6.265	12.168
	13.425	13.017	8.696	11.347	12.273	13.301
	14.474	14.652	5.171	13.047	6.197	10.795
	12.69	21.569	10.756	12.257	12.414	7.688
	14.239	9.781	10.214	11.85	13.756	12.067
	14.121	13.116	9.843	15.504	15.297	14.81
	11.239	13.587	9.752	15.302	6.056	13.412
	13.481	16.02	11.185	12.865	12.592	12.693
	10.999	15.925	11.013	9.103	8.206	12.608
	5.469	16.092	11.494	13.979	11.302	13.797
	9.841	11.414	6.069	12.059	11.826	14.005
	9.893	13.596	12.703	11.079	6.941	11.436
	12.993	13.228	11.573	16.052	11.693	13.304
	12.18	15.36	13.579	11.348	13.512	14.103
	13.112	15.282	7.644	13.026	13.248	13.824
	14.142	15.409	10.875	13.995	12.505	9.931
	11.438	13.576	10.614	13.531	8.489	12.609
	12.506	15.577	11.431	13.127	13.296	11.237
	13.584	17.129	12.946	12.277	13.138	10.591
	11.854	16.273	12.226	4.692	10.104	12.269
	12.652	12.863	13.96	8.784	14.052	7.764
	14.15	10.735	7.331	7.656	6.221	12.751
	12.585	15.46	8.407	13.417	11.664	9.601
	11.558	14.679	10.199	13.388	5.072	11.235
	11.547	12.211	12.594	15.832	8.643	12.314
	12.891	13.183	11.093	13.505	12.336	7.538
	13.836	14.884	10.057	6.944	13.367	11.107
	12.261	14.891	10.916	10.54	12.701	7.972
	11.648	11.918	13.389	15.812	10.347	13.086
	7.285	15.716	10.833	12.966	14.023	13.066
	15.362	8.414	10.628	6.04	14.106	13.574
	15.905	12.605	11.881	11.317	9.438	14.106
	11.303	14.856	7.585	9.261	10.597	15.626
	11.772	12.033	9.957	8.617	9.368	20
	13.171	12.009	9.488	14.964	12.929	20.171
	11.552	15.552	8.382	16.597	13.574	13.433
	12.326	13.938	10.938	12.144	23.395	29.881
	11.671	14.953	9.074	13.237	16.954	8.063
	12.511	13.403	10.519	12.94	12.761	11.494
	7.238	13.905	10.884	14.81	13.666	5.188
	23.101	15.448	11.105	13.149	6.22	14.663
	14.94	14.683	12.412	10.581	7.579	14.195
	18.547	14.665	12.043	11.582	11.72	14.82
	22.348	17.092	11.877	12.599	12.188	6.499
	11.365	14.851	10.998	19.193	12.344	9.929
	10.862	14.356	8.642	11.667	9.211	13.396
	11.11	14.408	9.142	6.845	11.481	12.049
	11.098	15.195	9.356	7.589	13.537	6.243
	12.256	16.508	10.609	12.017	8.669	11.551
	13.302	36.439	8.91	6.568	11.392	12.203
	10.46	14.847	8.872	13.526	12.181	11.944
	8.587	14.256	12.503	26.916	7.758	15.462
	8.676	14.962	10.962	26.927	12.488	13.463
	9.955	14.637	11.564	16.845	5.944	7.199
	8.76	14.172	11.571	8.701	5.759	17.277
	12.945	15.547	11.792	23.723	5.602	16.52
	13.64	15.342	11.423	22.305	13.089	6.26
	9.15	17.191	11.606	10.042	10.166	15.365
	8.924	7.874	14.461	13.211	5.438	12.321
	14.653	34.892	13.064	23.278	6.885	8.146
	13.877	15.982	12.64	16.06	8.594	10.341
	11.029	17.527	7.352	16.804	11.75	10.017
	14.562	20.907	11.112	14.025	10.198	14.513
	13.292	13.37	12.521	10.54	6.824	16.369
	25.546	14.822	14.293	6.304	12.416	27.896
	17.081	14.715	12.493	15.235	10.991	12.546
	15.695	12.825	7.774	10.906	5.567	12.103
	7.993	13.083	14.65	11.621	7.758	11.312
	9.756	8.617	12.29	13.002	8.63	14.611
	12.441	14.976	9.439	15.941	15.186	10.272
	12.008	13.379	9.503	10.453	14.187	13.533
	13.129	14.239	8.482	13.939	16.315	14.517
	13.439	13.01	6.849	13.269	14.317	13.716
	13.819	15.659	8.056	11.43	11.501	7.93
	11.967	15.199	8.219	12.412	6.541	13.475
	12.057	13.58	11.379	12.148	5.536	13.021
	10.623	13.078	8.057	12.668	8.901	12.312
	12.822	15.707	8.794	12.684	10.871	12.162
	15.959	14.63	7.785	12.534	14.223	13.492
	13.027	14.7	10.591	12.442	13.673	12.767
	13.012	13.766	9.905	10.368	13.873	13.399
	14.735	11.703	7.944	11.538	11.892	18.075
	13.149	12.587	7.354	11.946	7.979	23.803
	7.885	15.611	7.224	21.235	17.713	16.039
	14.436	14.234	10.976	18.107	13.948	11.656
	13.035	13.519	13.029	13.218	13.128	4.907
	12.709	16.214	33.132	9.798	12.072	5.554
	16.067	17.984	7.85	8.8	10.459	12.453
	18.795	10.497	9.447	12.787	5.656	10.419
	13.972	14.508	4.943	10.783	7.193	10.22
	13.735	15.931	8.743	12.806	12.51	12.26
	11.914	37.309	11.231	9.69	15.019	15.279
	4.944	14.439	11.739	8.194	15.748	15.244
	9.896	16.295	12.912	10.917	8.036	6.685
	12.617	16.799	11.053	10.817	11.583	12.097
	5.835	12.566	10.442	15.398	12.63	14.541
	12.425	15.67	12.872	5.648	11.692	10.622
	16.348	10.71	12.671	15.773	12.859	11.429
	13.333	16.362	12.493	12.317	12.691	13.603
	13.022	20.298	11.661	11.998	9.529	12.107
	7.821	12.067	10.917	8.291	8.738	12.837
	9.444	14.338	11.102	9.271	11.91	12.857
	9.528	15.341	10.047	15.828	11.939	13.599
	8.967	14.251	8.617	13.226	9.409	13.46
	15.125	14.892	13.366	14.728	14.65	10.97
	12.822	11.222	10.237	8.213	12.89	14.083
	10.546	11.079	7.884	14.192	14.631	14.328
	10.617	10.375	7.415	6.348	7.545	13.414
	11.405	14.161	8.563	13.807	6.036	13.314
	13.051	15.383	6.114	16.679	7.299	15.38
	13.271	15.995	13.825	19.273	10.868	13.336
	13.98	15.893	14.186	10.243	7.256	12.364
	13.871	15.784	10.046	8	11.424	11.778
	28.127	16.416	9.849	10.695	7.233	12.403
	11.122	16.284	9.822	11.267	12.056	8.988
	11.404	11.802	13.13	13.637	7.297	12.997
	15.107	13.832	9.677	11.908	11.353	13.635
	12.077	17.14	9.084	12.096	9.127	14.355
	9.064	13.349	10.641	20.141	9.773	14.725
	12.032	13.03	13.973	21.251	11.872	12.744
	11.678	14.546	13.336	14.027	8.779	7.293
	11.567	12.821	10.192	16.724	8.001	13.073
	11.92	16.096	12.289	12.812	6.403	8.1
	22.422	13.606	12.703	11.889	5.405	10.96
	10.479	9.149	6.394	9.393	8.58	13.819
	11.513	15.708	10.387	6.181	11.929	11.312
	12.404	12.858	8.826	10.77	11.521	14.473
	9.878	15.706	11.382	13.149	12.891	15.447
	10.079	11.552	9.67	10.948	5.515	15.334
	15.293	10.851	10.032	7.205	10.351	16.11
	14.347	12.206	11.69	20.096	10.548	12.691
	31.485	14.667	7.555	16.683	10.885	11.842
	17.155	13.037	8.753	8.326	12.672	7.074
	20.447	14.376	11.147	12.46	7.315	9.601
	14.437	11.771	12.181	14.317	11.039	12.369
	12.571	14.696	13.496	10.042	6.346	12.322
	13.722	15.777	10.933	9.584	10.615	8.901
	12.176	13.875	7.909	14.831	17.42	9.225
	13.229	16.288	10.38	15.189	13.097	13.251
	11.095	16.464	11.149	17.165	13.888	9.425
	13.412	11.826	10.145	16.382	10.085	11.79
	12.309	12.417	8.706	16.257	12.16	12.665
	13.965	12.516	10.952	14.44	11.783	5.851
	12.253	14.008	8.047	15.213	16.247	11.17
	10.7	16.39	13.208	9.939	12.143	13.271
	11.167	16.066	26.444	7.631	15.573	14.769
	13.019	8.086	12.962	6.343	7.132	12.418
	12.95	13.116	12.456	5.69	10.009	13.081
	10.705	14.829	5.585	13.107	14.513	12.643
	13.906	10.335	8.961	12.551	7.247	13.371
	15.136	14.255	8.282	16.61	10.726	11.389
	14.443	11.961	8.333	12.135	32.329	11.948
	14.114	11.088	8.214	11.555	7.297	7.436
	12.833	10.712	11.735	8.298	11.19	12.006
	8.14	15.538	10.782	9.42	9.497	11.857
	8.956	13.167	8.239	13.603	9.102	13.935
	11.266	12.349	8.056	7.77	8.434	12.758
	13.373	13.343	11.898	4.427	6.101	13.982
	13.872	13.086	11.692	11.946	7.737	11.966
	11.097	11.164	11.982	9.848	7.727	5.55
	13.698	11.95	7.238	11.066	6.469	13.174
	11.329	14.709	8.217	5.039	12.967	9.331
	12.11	15.718	9.743	14.2	17.129	7.436
	8.885	10.124	6.702	11.499	14.312	11.43
	9.338	8.589	7.548	13.735	12.064	12.78
	9.865	9.223	10.367	13.055	12.191	13.307
	13.84	18.874	7.73	14.525	9.677	13.77
	7.76	14.103	7.082	4.702	14.075	11.675
	12.365	28.413	7.002	12.052	8.049	15.4
	14.583	13.407	6.81	12.564	11.407	13.01
	12.789	15.469	12.546	10.639	6.465	11.143
	11.87	9.178	8.739	15.091	12.585	14.281
	14.116	9.99	9.601	12.547	12.913	13.589
	12.962	11.249	9.452	12.589	13.341	13.469
	8.623	15.352	9.029	10.003	9.252	12.504
	12.487	13.513	10.313	9.94	8.796	11.696
	16.329	11.396	8.952	12.986	9.91	13.014
	14.673	14.071	9.792	22.181	12.973	11.158
	10.553	14.015	11.726	16.478	8.764	13.951
	24.104	12.143	9.781	16.309	10.86	13.205
	12.737	14.63	9.581	10.76	12.41	11.933
	16.932	13.681	9.93	8.817	8.608	9.439
	9.619	12.216	10.006	10.611	9.901	12.731
	13.531	15.635	7.224	11.576	7.102	13.685
	12.252	15.11	8.373	7.216	10.265	12.021
	13.529	15.382	8.177	5.116	9.884	12.922
	17.942	16.45	7.202	9.976	13.543	7.414
	12.593	14.403	5.469	11.34	10.723	5.886
	10.94	18.491	12.429	12.617	11.04	6.041
	12.649	16.025	13.87	12.82	4.994	11.807
	14.888	13.521	13.611	12.59	9.252	13.823
	12.471	16.715	13.463	14.207	18.205	12.901
	12.619	16.472	11.587	11.6	5.501	11.392
	14.874	14.524	15.744	8.147	12.067	13.459
	17.322	13.516	11.896	9.829	12.986	12.468
	14.352	15.599	10.647	17.486	47.215	9.508
	5.935	11.631	11.64	8.945	8.096	18.032
	8.941	17.921	15.954	10.756	6.295	12.655
	8.232	19.059	11.289	19.419	12.065	8.519
	13.694	11.901	11.8	12.781	10.736	10.705
	13.11	16.035	7.322	11.224	10.209	11.226
	14.149	14.907	12.524	8.55	14.431	10.521
	10.731	14.317	11.734	10.622	8.084	9.467
	9.773	14.979	9.317	10.786	13.985	12.636
	14.846	11.095	8.543	8.898	14.709	11.99
	16.714	15.174	10.082	16.609	11.246	21.019
	12.868	15.694	9.972	18.092	14.169	12.282
	15.014	14.15	9.174	14.776	9.325	14.143
	13.665	13.443	7.442	10.818	13.518	10.254
	15.076	11.887	10.94	10.804	9.458	8.615
	13.926	12.319	8.822	13.159	11.333	10.626
	15.008	13.14	10.72	14.573	13.174	12.7
	12.963	13.266	10.353	14.588	12.287	5.586
	14.795	10.535	10.902	14.039	12.704	12.275
	13.166	13.098	8.546	18.646	12.93	8.8
	9.819	12.922	11.076	10.142	11.791	16.729
	9.527	13.669	7.426	12.841	12.625	12.912
	12.657	14.294	9.169	12.054	7.753	12.245
	13.821	18.569	12.032	12.907	9.935	11.059
	15.279	11.974	12.462	11.354	14.126	8.978
	13.854	15.923	13.7	12.142	8.408	11.434
	8.975	14.078	20.25	8.193	6.251	9.094
	12.829	15.024	12.95	11.081	11.042	13.082
	12.505	9.79	12.028	9.387	6.902	13.736
	16.625	12.302	12.578	16.315	16.11	13.606
	13.448	11.907	12.058	16.171	15.907	13.164
	14.906	15.272	9.218	13.032	12.887	13.461
	8.85	15.274	10.959	10.586	7.906	13.755
	10.094	11.12	12.022	13.312	12.218	11.766
	23.373	14.753	8.382	12.958	12.094	10.773
	10.374	14.323	10.373	12.607	9.095	12.33
	13.353	17.027	8.737	11.443	13.846	14.232
	9.516	14.791	9.003	12.103	5.479	11.826
	22.142	13.948	9.337	11.257	12.729	7.425
	7.39	14.25	6.376	12.136	13.046	8.141
	10.643	12.3	6.528	8.79	8.204	15.549
	10.056	19.555	6.069	13.84	12.135	12.318
	13.198	18.618	8.364	13.177	6.712	12.727
	13.446	15.042	17.818	11.046	11.062	13.538
	14.121	12.662	12.792	10.867	11.673	11.781
	11.275	14.333	12.815	7.53	12.871	12.672
	42.047	14.291	8.433	10.372	7.849	12.695
	10.625	15.565	9.032	9.667	14.13	9.988
	11.247	14.929	9.456	10.874	18.71	12.823
	12.706	14.192	10.371	11.118	11.783	10.498
	13.711	13.618	10.688	9.363	13.576	12.55
	13.324	16.249	13.35	13.452	8.187	4.81
	12.989	19.323	13.43	6.439	11.468	12.6
	13.854	13.55	10.84	9.502	13.872	11.625
	12.652	12.808	10.207	20.027	14.987	11.635
	13.563	12.84	9.864	31.182	13.501	9.22
	14.742	34.105	7.765	21.397	8.27	12.014
	13.811	13.412	14.707	10.004	12.231	11.602
	8.949	9.568	13.307	12.983	12.192	10.293
	9.995	7.528	11.69	7.287	11.996	11.939
	12.619	11.311	11.285	14.365	14.602	7.574
	14.512	10.657	11.169	11.88	11.609	11.162
	13.816	43.628	11.399	16.418	5.686	11.073
	12.439	36.042	12.581	10.866	6.764	12.682
	12.051	35.705	7.759	14.828	15.222	11.956
	13.405	13.519	13.725	14.706	6.72	14.553
	12.362	10.446	10.334	10.521	6.447	11.823
	7.645	14.475	11.409	11.272	11.781	11.824
	10.206	13.582	6.22	10.777	8.645	10.806
	7.984	10.298	8.443	11.981	14.045	13.547
	13.674	14.593	9.66	12.149	8.058	13.399
	13.96	9.144	11.35	14.672	8.749	8.494
	20.506	13.616	9.036	18.343	13.246	7.12
	13.12	11.018	11.515	14.51	8.391	15.547
	12.357	13.395	10.527	8.072	6.01	13.63
	11.039	14.29	11.764	9.76	12.216	15.278
	7.651	16.13	10.975	7.141	12.868	16.336
	7.126	14.826	11.603	11.456	7.27	12.394
	11.826	15.177	12.532	13.276	6.866	11.695
	11.028	17.203	9.233	9.685	13.506	15.282
	12.318	20.077	5.22	17.977	8.078	7.174
	14.249	14.738	10.088	14.611	13.848	13.439
	14.28	14.559	8.207	9.103	15.285	14.215
	12.687	14.388	7.809	13.527	11.424	14.675
	13.604	11.529	7.887	12.867	13.607	9.054
	9.825	10.251	7.811	13.057	9.712	13.061
	10.766	11.883	9.344	23.647	12.143	12.853
	14.087	14.535	6.632	14.603	11.335	5.6
	13.174	15.547	9.088	11.636	11.73	14.301
	6.501	13.981	10.609	14.265	12.256	7.11
	7.33	12.53	12.343	11.726	8.583	16.45
	11.022	13.948	13.435	9.811	12.226	16.209
	10.217	13.528	10.083	10.572	12.907	11.835
	12.934	13.598	6.297	10.484	5.836	12.527
	11.607	13.311	14.48	11.665	7.68	13.629
	12.795	14.58	13.022	15.556	10.426	16.407
	13.502	14.241	12.075	13.122	12.184	12.719
	18.642	16.312	20.166	14.734	7.782	13.307
	14.28	14.008	10.333	18.702	7.923	13.189
	14.318	15.653	13.092	9.986	10.33	15.247
	14.161	11.527	5.649	13.291	14.325	16.397
	10.988	11.391	7.354	8.336	13.71	13.666
	13.907	24.835	5.871	5.112	6.717	11.836
	15.283	11.173	8.933	12.137	8.874	13.39
	15.433	12.471	7.812	13.575	7.847	12.228
	14.353	14.777	14.547	11.775	12.792	13.943
	17.682	14.161	11.413	6.452	7.598	5.168
	16.12	15.334	6.861	20.084	11.073	7.796
	8.572	14.688	9.531	11.977	8.545	12.374
	9.555	12.702	9.493	12.023	4.423	10.265
	10.026	13.487	11.751	11.774	6.381	8.66
	12.298	10.095	12.48	11.397	8.879	5.377
	12.858	12.524	8.803	13.839	11.632	13.701
	16.807	13.094	10.1	12.988	7.431	15.848
	13.488	11.125	13.901	10.874	8.356	11.768
	12.47	13.267	9.956	8.429	7.473	13.18
	9.657	13.365	10.635	12.158	10.2	10.629
	10.318	15.243	9.034	8.872	11.096	14.44
	12.64	13.42	13.366	13.023	12.122	12.849
	13.139	14.871	11.442	13.477	5.89	13.38
	11.747	12.842	12.598	14.963	9.312	12.792
	12.689	14.146	13.087	8.335	13.142	11.607
	15.241	12.228	6.492	15.056	14.316	11.713
	14.059	15.159	8.525	10.958	8.595	11.241
	14.138	15.565	6.237	9.867	7.569	10.861
	13.337	10.767	8.52	15.168	10.136	14.634
	8.339	10.908	10.233	14.217	11.73	16.103
	11.875	20.889	9.179	14.238	9.252	11.209
	10.806	13.083	9.415	6.974	9.586	13.823
	13.291	14.438	7.996	10.933	6.664	11.879
	14.259	11.851	9.867	14.278	9.387	11.54
	14.802	14.983	10.382	14.109	9.106	15.592
	13.446	15.088	10.094	9.22	9.642	13.004
	10.751	13.603	8.075	14.664	8.872	10.267
	10.773	9.672	12.329	17.702	7.679	12.034
	8.666	13.876	9.177	11.153	5.511	6.709
	9.443	11.127	8.048	13.06	5.385	9.23
	14.573	18.975	11.455	9.723	12.885	5.667
	13.017	14.562	8.57	12.1	9.332	11.893
	11.395	14.013	9.082	12.157	10.201	12.012
	7.532	16.207	10.454	13.531	9.659	13.235
	10.195	16.561	5.336	11.843	6.566	11.114
	13.913	11.16	11.371	20.067	9.865	15.624
	14.665	15.349	11.086	21.309	9.764	8.649
	10.405	14.584	12.118	19.418	4.831	12.696
	14.641	14.85	9.561	17.728	9.895	12.888
	15.422	17.852	10.748	22.421	9.504	14.435
	13.671	15.915	13.026	4.415	6.56	17.835
	13.238	16.119	10.565	17.803	11.513	11.068
	5.736	9.212	9.988	5.746	14.84	12.336
	12.26	14.578	10.568	9.937	16.274	8.948
	11.027	13.319	11.236	9.046	9.477	5.02
	11.55	14.828	9.385	11.565	5.545	11.404
	11.57	16.868	10.419	11.151	7.49	11.273
	12.562	15.078	10.908	13.235	7.106	11.857
	13.359	19.241	10.893	13.852	12.49	13.444
	11.843	11.83	9.379	11.307	6.74	12.001
	13.104	17.931	8.57	15.42	6.138	6.183
	14.218	16.698	10.465	12.471	5.656	11.32
	12.515	14.621	14.197	11.016	6.763	15.578
	11.959	12.515	14.454	12.779	13.181	12.4
	13.263	13.903	13.107	13.969	11.32	7.336
	13.02	14.87	13.702	10.797	13.076	11.358
	12.753	15.65	12.269	11.677	12.629	8.8
	13.661	17.714	13.945	13.723	11.807	10.863
	12.599	43.364	10.741	13.256	7.777	11.749
	12.609	14.282	13.216	9.853	11.759	11.282
	10.004	16.751	11.965	8.602	12.833	13.718
	13.5	15.175	12.427	8.403	7.005	15.45
	12.496	16.514	10.87	9.427	8.736	16.221
	12.289	14.808	12.957	11.401	8.947	12.598
	11.941	16.072	9.195	11.356	5.779	10.056
	11.295	13.539	10.845	15.354	16.947	9.674
	9.792	18.018	10.192	12.31	6.417	11.328
	12.862	16.173	9.829	27.199	10.95	13.479
	15.689	16.282	8.433	12.089	14.154	13.494
	16.322	14.943	12.675	9.262	8.794	12.235
	20.037	13.953	11.53	9.496	13.415	13.236
	7.641	15.958	13.335	13.672	13.002	13.281
	11.244	16.438	11.458	8.342	10.033	13.383
	11.025	12.848	9.964	6.361	10.683	12.006
	10.072	11.274	8.774	9.493	12.339	11.555
	12.361	12.786	8.857	13.232	8.825	7.676
	7.358	15.144	8.971	10.611	9.985	12.983
	13.811	11.289	9.958	15.292	15.883	21.36
	13.723	14.019	11.958	8.659	14.559	7.414
	12.988	12.423	11.851	17.902	13.943	15.878
	13.482	15.755	9.905	11.913	4.745	24.013
	13.074	13.272	6.735	13.626	5.69	14.978
	4.979	10.072	6.851	15.654	9.828	11.979
	14.68	14.511	7.17	12.78	11.203	8.926
	10.295	12.733	9.845	10.199	9.337	11.809
	11.527	11.727	10.218	13.131	9.961	13.613
	9.465	15.241	6.708	11.416	12.988	8.525
	13.173	17.453	12.492	8.081	5.89	13.088
	13.878	11.579	11.882	13.614	12.364	11.902
	13.944	12.989	12.813	12.913	7.36	13.031
	13.096	13.665	12.792	11.135	11.649	22.825
	11.413	13.524	9.047	12.646	14.39	10.546
	14.154	14.834	10.595	13.622	9.821	9.062
	13.911	15.63	8.356	10.785	7.093	9.425
	13.5	14.243	8.106	13.177	10.043	12.764
	13.957	14.607	14.688	13.847	8.532	13.286
	11.956	13.874	13.536	9.3	10.426	12.958
	8.74	15.98	12.101	15.514	11.713	12.868
	12.582	14.681	6.641	17.18	12.545	13.846
	13.406	14.51	13.224	14.36	12.728	12
	10.083	16.086	9.998	9.537	6.38	12.828
	14.586	15.607	9.581	17.858	14.853	13.546
	13.227	12.448	9.571	13.837	12.227	7.468
[truncated: 215,847+ more rows]

## Sheet: Diameters in bins
Figure 3I: Raw numbers used for vessel diameter in 5um bins
Bins	Wt1	WT2	WT3	Mut1	Mut2	Mut3
5	1.00304	0.376416	4.18114	3.13874	5.56499	3.16486
10	29.7607	22.4078	54.1841	29.126	42.1318	33.9886
15	49.2551	53.2537	30.297	41.1326	38.8773	48.8702
20	11.2818	13.8599	5.4974	17.6649	6.96403	8.73779
25	3.63985	4.4385	2.18634	5.51454	2.75696	3.17149
30	1.81432	2.16898	1.27171	1.91633	1.41894	1.3534
35	1.11573	1.33031	0.761693	0.814937	0.872328	0.473816
40	0.722188	0.846477	0.586488	0.362089	0.554575	0.152683
45	0.475558	0.527442	0.385301	0.146537	0.347605	0.0572562
50	0.296191	0.320413	0.249443	0.0614512	0.206307	0.0224046
55	0.193527	0.180863	0.172977	0.0510518	0.123386	0.0058086
60	0.135115	0.117515	0.081663	0.0378161	0.0736338	0.0016596
65	0.0932236	0.0743651	0.0697847	0.014181	0.0484258	0
70	0.0690327	0.0367235	0.0289532	0.00850863	0.0245446	0
75	0.0472018	0.0215751	0.0155902	0.00567242	0.0218911	0
80	0.0312712	0.0179027	0.017075	0.000945403	0.00132674	0
85	0.0182907	0.00780375	0.00668151	0.00189081	0.00729704	0
90	0.0141605	0.00550853	0.00371195	0.000945403	0.00132674	0
95	0.0141605	0.00367235	0.00074239	0.000945403	0.0019901	0
100	0.00885034	0.000918088	0	0	0.000663368	0
105	0.0053102	0.000918088	0.00148478	0	0	0
110	0.00472018	0.000918088	0.00074239	0	0.000663368	0
115	0.000590023	0.000918088	0	0	0	0
120	0	0.000459044	0	0	0	0
