# Supplementary material for: Progressive mural cell deficiencies across the lifespan in a foxf2 model of cerebral small vessel disease
Source: eLife. 2026 Mar 6;14:RP106720. doi: 10.7554/eLife.106720 (PMC12965718; doi:10.7554/eLife.106720)
Supplement: Figure 4—source data 1. [file elife-106720-fig4-data1.xlsx]

## Sheet: Sample information
Figure	Genotype	Age	# of Fish
Figure 4B	Wildtype	5 dpf	20
	foxf2a-/-		12
Figure 4D	Wildtype	10 dpf	6
	foxf2a-/-		3
Figure 4 F-H	Wildtype	6 mpf	3
	foxf2a-/-

## Sheet: SMC embryo
Figure 4 B, D: vSMCs in the Circle of Willis at 5 and 10 dpf in foxf2a wildtype and mutant
5 dpf			10 dpf
wildtype	foxf2a-/-		wildtype	foxf2a-/-
22	24		30	34
23	1		26	45
25	24		20	30
4	34		44	41
14	16		33
24	27		41
21	31
21	31
22	26
25	27
26	30
24	30
24
31
31
24
34
26
27
30

## Sheet: SMC adult
Figure 4F,H,G: Smooth muscle length in the adult brain, vessel network length and coverage (vSMC length/vessel network length).
Vessel length			SMC length			vSMC coverage
EH WT - 6 mon	EH Mut		WT	Mut		WT	Mut
4440000	3190000		40600	20000		0.00914414	0.00626959
6060000	2480000		53600	40400		0.00884488	0.0162903
4720000	3880000		53300	50500		0.0112924	0.0130155
