# Supplementary material for: Progressive mural cell deficiencies across the lifespan in a foxf2 model of cerebral small vessel disease
Source: eLife. 2026 Mar 6;14:RP106720. doi: 10.7554/eLife.106720 (PMC12965718; doi:10.7554/eLife.106720)
Supplement: Figure 5—source data 1. [file elife-106720-fig5-data1.xlsx]

## Sheet: n's for Figure 5
Figure	Genotype	Age	# of Fish	# of Pericytes
Figure 5B, D	Wildtype	3 dpf	6	66
		10 dpf	3	52
	foxf2a-/-	3 dpf	7	39
		10 dpf	11	77
	WildtypeUAS:Zebrabow	3 dpf	6	24
		10 dpf	4	39
	foxf2a-/-	3 dpf	5	29
		10 dpf	5	32
Figure	Genotype	Age	# of Fish
Figure 5F	WildtypeUAS:Zebrabow	10 dpf	6
Figure	Genotype	Age	# of Fish	# of Interactions
Figure 5G	WildtypeUAS:Zebrabow	10 dpf	6	17

## Sheet: Soma area
Figure 5B: Soma area
Wildtype			foxf2a mutant
3	10		3	10
32.102	32.2		72.382	24.751
49.336	22.708		34.13	48.901
34.671	21.747			34.122
70.896	29.557			29.437
66.435	23.309			36.525
49.877	17.662			38.328
53.594	46.978			54.307
50.012	37.607			33.762
16.49	50.943			31.119
25.006	19.704			26.793
37.644	30.398			22.348
36.495	35.444			24.51
55.959	16.701			40.13
41.902	30.998			17.181
36.428	24.15			32.681
39.807	16.701			31.479
49.261	33.762			26.433
38.207	28.836			30.278
30.037	31.359			20.425
86.868	47.819			44.816
21.026	55.509			22.107
31.239	42.172			19.945
46.017	33.762			32.32
	32.32			24.751
	28.956			37.246
	21.026			20.786
	35.084			24.991
	38.808			69.086
	39.529			23.429
43.321	24.03			51.184
50.756	28.596			57.672
44.943	35.324			65.601
25.344	27.034			87.949
31.427	32.56			60.435
45.214	32.801			26.913
36.833	34.122			59.113
27.574	38.928		22.708	43.614
18.653	39.289		38.861	48.901
20.275	33.041		77.022	42.052
38.793	32.681		59.566	61.516
57.108	57.071		42.74	27.514
57.041	52.265			75.934
61.366	14.658			43.734
33.589	19.584			38.928
42.983	48.781			57.191
55.757	29.196			107.173
28.115	14.778			52.866
62.853	66.683			120.269
41.429	17.782			101.887
30.616	24.871		52.851	40.13
42.172	27.034		60.285	30.638
38.455	31.719		58.122	23.429
32.373			66.773	32.44
42.24			50.891	48.901
32.711			26.763	31.239
35.549			29.669	29.797
69.476			15.004	34.963
20.425			28.723	20.786
34.363			46.565	22.228
30.878				20.185
53.226				27.274
56.831				28.596
22.107				34.843
38.087				27.754
39.169				24.991
44.335				38.568
53.707			26.966	67.404
40.971			50.35	35.204
51.544			48.728	29.677
40.61			35.684	51.544
29.557			75.897	32.08
35.925			55.013
			40.483	52.505
			35.414	47.098
			48.39	20.546
			57.919	48.901
			70.693	53.587
			33.724	36.045
			45.146
			30.818
			41.564
			11.287
			43.659
			59.474
			46.768
			36.081
			37.521
			43.37

## Sheet: Pericyte process lengths
Figure 5D:Pericyte process lengths
foxf2a-/- 3 dpf	UAS:Zebrabow 3 dpf	foxf2a-/- 10 dpf	UAS:Zebrabow 10 dpf
117.509	135.55	151.714	102.523
120.113	87.535	189.452	82.114
117.948		67.6288	130.411
114.366	88.181		65.52
88.6432			91.051
109.042	81.555		57.922
101.241	97.92		117.415
67.3787	62.647		67.212
160.668	50.758		108.06
157.697	33.573
71.1769	80.478		174.955
65.7035	75.968		94.559
98.162	52.485	76.5359	107.704
111.869	70.768		79.788
74.9605	47.026	123.885	123.776
39.1923	65.065		75.702
70.168	118.545	85.0357	87.173
90.709			87.173
99.892	75.23	73.0672	112.088
86.578	150.205		96.697
70.057	56.099		64.177
97.6345	114.017	94.5296	140.877
85.8254			96.321
94.4348	82.741	137.529	116.865
100.595	76.992
114.366			80.808
137.86	103.817		91.508
168.508	92.035		144.961
153.161	51.549		86.602
			45.663
			39.038
		295.78	86.032
			130.344
			94.013
		268.807	140.063
			91.169
			94.554
			103.632
		184.219	96.64
			70.307
			81.294
		139.072
		325.293
		133.457
		127.053
		249.067
		84.0475
		84.8499
		107.032
		164.946
		122.214
		91.2614
		56.3497
		124.585
		111.009
		98.7317
		357.604
		219.296
		151.53
		106.291
		122.773

## Sheet: Overlap of processes
Figure 5:G- overlap of pericyte processes
