# Supplementary material for: Progressive mural cell deficiencies across the lifespan in a foxf2 model of cerebral small vessel disease
Source: eLife. 2026 Mar 6;14:RP106720. doi: 10.7554/eLife.106720 (PMC12965718; doi:10.7554/eLife.106720)
Supplement: Figure 6—source data 1. [file elife-106720-fig6-data1.xlsx]

## Sheet: N's for Figure 6
Figure	Genotype	Age	# of Fish with Phenotype
Figure 6B	Wildtype	3 dpf	0 of 10
		5 dpf	0 of 17
		7 dpf	0 of 14
		10 dpf	0 of 10
	foxf2a-/-	3 dpf	0 of 21
		5 dpf	9 of 26
		7 dpf	5 of 21
		10 dpf	5 of 11

## Sheet: degeneration penetrance
Figure 6: degeneration penetrance
	Wildtype	foxf2a-/-
3 dpf	0	0
5 dpf	0	35
7 dpf	0	24
10 dpf	0	45
