# Supplementary material for: Progressive mural cell deficiencies across the lifespan in a foxf2 model of cerebral small vessel disease
Source: eLife. 2026 Mar 6;14:RP106720. doi: 10.7554/eLife.106720 (PMC12965718; doi:10.7554/eLife.106720)
Supplement: Figure 7—source data 1. [file elife-106720-fig7-data1.xlsx]

## Sheet: Figure 7
Trial 1
Treatment	Genotype (Foxf2a)	Brain Pericyte Number
		3 dpf
DMSO	wt	28
	mut	18
	wt	29
	wt	30
	mut	13
	wt	21
MTZ	wt	0
	wt	2
	mut	1
	wt	0
	wt	0
Trial 1
Treatment	Genotype (Foxf2a)	Brain Pericyte Number
		10 dpf
DMSO	wt	107
MTZ	wt	10
	wt	68
	mut	31
TRIAL 2
Treatment	Genotype (Foxf2a)	Brain Pericyte Number
		3 dpf
DMSO	mut	4
	wt	19
MTZ	wt	3
	mut	1
	mut	0
	mut	N/A
	mut	1
	wt	3
	mut	6
	mut	2
TRIAL 2
Treatment	Genotype (Foxf2a)	Brain Pericyte Number
		10 dpf
DMSO	mut	19
	mut	75
	WT	22
	WT	80
MTZ	mut	68
	WT	64
	mut	59
	wt	76
TRIAL 3
Treatment	Genotype (Foxf2a)	Brain Pericyte Number
		3 dpf
DMSO	wt	13
	mut	10
	mut	12
	wt	20
MTZ	mut	1
	wt	3
	wt	3
	mut	3
TRIAL 3
Treatment	Genotype (Foxf2a)	Brain Pericyte Number
		10 dpf
DMSO	mut	68
	mut	61
	mut	17
MTZ	wt	29
	mut	9
	wt	28
	mut	15
TRIAL 4
Treatment	Genotype (Foxf2a)	Brain Pericyte Number
		3 dpf
DMSO	wt	20
	mut	11
	mut	14
	wt	23
	wt	23
	mut	15
MTZ	wt	1
	mut	3
	wt	5
	mut	2
	mut	0
	mut	2
TRIAL 4
Treatment	Genotype (Foxf2a)	Brain Pericyte Number
		10 dpf
DMSO	mut	54
	mut	58
	wt	59
	wt	54
	mut	70
	wt	69
	mut	67
	wt	53
	wt	42
	wt	62
	mut	49
MTZ	wt	17
	wt	24
	mut	13
	mut	12
	wt	16
	mut	19
	mut	15
TRIAL 5
Treatment	Genotype (Foxf2a)	Brain Pericyte Number
		3 dpf
DMSO	mut	8
	mut	18
	wt	14
	mut	6
	wt	18
	wt	12
MTZ	wt	2
	mut	5
	wt	4
	mut	2
	wt	3
	mut	2
	wt	1
	wt	0
TRIAL 5
Treatment	Genotype (Foxf2a)	Brain Pericyte Number
		10 dpf
DMSO	wt	90
	wt	99
	mut	60
	wt	89
	mut	35
	wt	86
MTZ	wt	62
	wt	49
	wt	84
	mut	49
	wt	45
	wt	25
	mut	57
	mut	30
	mut	54
